# Supplementary material for: High-quality genome assembly of Verticillium dahliae VD991 allows for screening and validation of pathogenic genes
Source: Front Microbiol. 2023 May 31;14:1177078. doi: 10.3389/fmicb.2023.1177078 (PMC10289290; doi:10.3389/fmicb.2023.1177078)
Supplement: Supplementary file 5 [file Table_5.xlsx]

## Sheet: Sheet1
Table S5. Prediction of secreted proteins.
geneID	star	end	direction	function
Vd01G0011	76551	79093	+	cell wall glycosyl hydrolase YteR [Verticillium dahliae VdLs.17]
Vd01G0024	118840	122689	+	beta-lactamase family protein [Verticillium dahliae VdLs.17]
Vd01G0029	133126	134544	+	hypothetical protein VDAG_00757 [Verticillium dahliae VdLs.17]
Vd01G0042	176381	178628	-	hypothetical protein VDAG_08673 [Verticillium dahliae VdLs.17]
Vd01G0050	195371	196141	-	hypothetical protein VDAG_03406 [Verticillium dahliae VdLs.17]
Vd01G0058	216478	217942	-	anhydro-N-acetylmuramic acid kinase [Verticillium alfalfae VaMs.102]
Vd01G0081	281316	282014	-	hypothetical protein VDAG_08085 [Verticillium dahliae VdLs.17]
Vd01G0128	443746	445701	-	hypothetical protein VDAG_00481 [Verticillium dahliae VdLs.17]
Vd01G0180	685718	687028	-	hypothetical protein VDAG_09774 [Verticillium dahliae VdLs.17]
Vd01G0181	690199	693827	-	hypothetical protein VDAG_02938 [Verticillium dahliae VdLs.17]
Vd01G0198	741121	744144	-	hypothetical protein VDAG_07548 [Verticillium dahliae VdLs.17]
Vd01G0204	755932	758438	-	hypothetical protein VDAG_08708 [Verticillium dahliae VdLs.17]
Vd01G0216	802452	808859	-	3-oxoacyl-[acyl-carrier-protein] reductase [Verticillium dahliae VdLs.17]
Vd01G0230	844109	844607	+	hypothetical protein VDAG_07264 [Verticillium dahliae VdLs.17]
Vd01G0294	1027018	1028799	+	hypothetical protein VDAG_09504 [Verticillium dahliae VdLs.17]
Vd01G0311	1061682	1062665	+	hypothetical protein VDAG_08714 [Verticillium dahliae VdLs.17]
Vd01G0313	1069572	1080803	-	hypothetical protein VDAG_07537 [Verticillium dahliae VdLs.17]
Vd01G0341	1160557	1163025	+	cutinase [Verticillium dahliae VdLs.17]
Vd01G0359	1226684	1231843	-	hypothetical protein VDAG_07157 [Verticillium dahliae VdLs.17]
Vd01G0373	1274730	1279461	-	endoglucanase-4 [Verticillium alfalfae VaMs.102]
Vd01G0374	1280721	1282238	-	hypothetical protein VDAG_07991 [Verticillium dahliae VdLs.17]
Vd01G0375	1282820	1285849	+	acetylxylan esterase [Verticillium dahliae VdLs.17]
Vd01G0378	1290276	1290821	-	hypothetical protein VDAG_08481 [Verticillium dahliae VdLs.17]
Vd01G0398	1344458	1346139	-	choline dehydrogenase [Verticillium dahliae VdLs.17]
Vd01G0404	1359101	1361188	+	hypothetical protein VDAG_02669 [Verticillium dahliae VdLs.17]
Vd01G0411	1389482	1389958	-	hypothetical protein VDAG_10173 [Verticillium dahliae VdLs.17]
Vd01G0412	1390993	1392316	-	hypothetical protein VDAG_03821 [Verticillium dahliae VdLs.17]
Vd01G0415	1403491	1405226	+	hypothetical protein VDAG_04705 [Verticillium dahliae VdLs.17]
Vd01G0419	1418370	1422627	-	pectate lyase [Verticillium dahliae VdLs.17]
Vd01G0432	1452577	1453206	-	endoglucanase II [Verticillium dahliae VdLs.17]
Vd01G0437	1463261	1468336	+	ycaC [Verticillium alfalfae VaMs.102]
Vd01G0444	1487367	1492225	-	rds1 [Verticillium dahliae VdLs.17]
Vd01G0450	1504428	1506051	+	fungal cellulose binding domain-containing protein [Verticillium dahliae VdLs.17]
Vd01G0469	1555162	1556061	-	hypothetical protein VDAG_08138 [Verticillium dahliae VdLs.17]
Vd01G0478	1577294	1579067	-	hypothetical protein VDAG_01605 [Verticillium dahliae VdLs.17]
Vd01G0479	1579652	1581031	-	hypothetical protein VDAG_05791 [Verticillium dahliae VdLs.17]
Vd01G0484	1589376	1591025	-	trypsin [Verticillium dahliae VdLs.17]
Vd01G0487	1597788	1599121	+	hypothetical protein VDAG_05997 [Verticillium dahliae VdLs.17]
Vd01G0528	1722299	1724145	-	conserved hypothetical protein [Verticillium alfalfae VaMs.102]
Vd01G0537	1750369	1754383	+	hypothetical protein FPSE_04937 [Fusarium pseudograminearum CS3096]
Vd01G0585	1886205	1886832	+	serin endopeptidase [Verticillium dahliae VdLs.17]
Vd01G0592	1903037	1905020	-	pectate lyase D [Verticillium dahliae VdLs.17]
Vd01G0612	1977805	1978851	-	hypothetical protein VDAG_01680 [Verticillium dahliae VdLs.17]
Vd01G0623	2013863	2016251	-	pectate lyase B [Verticillium dahliae VdLs.17]
Vd01G0626	2020779	2023378	-	conserved hypothetical protein [Verticillium alfalfae VaMs.102]
Vd01G0630	2032735	2033937	-	hypothetical protein VDAG_00429 [Verticillium dahliae VdLs.17]
Vd01G0659	2097170	2099122	+	laccase-1 [Verticillium dahliae VdLs.17]
Vd01G0686	2185966	2187625	-	pectate lyase [Verticillium alfalfae VaMs.102]
Vd01G0723	2303063	2308292	-	hypothetical protein VDAG_02105 [Verticillium dahliae VdLs.17]
Vd01G0755	2417188	2419432	+	hypothetical protein VDAG_07241 [Verticillium dahliae VdLs.17]
Vd01G0758	2425712	2428623	-	glycosyl hydrolase family 43 protein [Verticillium dahliae VdLs.17]
Vd01G0771	2457310	2458287	-	hypothetical protein VDAG_00140 [Verticillium dahliae VdLs.17]
Vd01G0781	2491853	2492837	-	pectate lyase D [Verticillium alfalfae VaMs.102]
Vd01G0799	2542863	2543257	+	hypothetical protein VDAG_01296 [Verticillium dahliae VdLs.17]
Vd01G0820	2613359	2615386	+	acetylesterase [Verticillium dahliae VdLs.17]
Vd01G0854	2714108	2717188	-	L-amino-acid oxidase [Verticillium dahliae VdLs.17]
Vd01G0863	2746741	2748754	+	cellobiose dehydrogenase [Verticillium dahliae VdLs.17]
Vd01G0870	2766436	2769821	-	hypothetical protein VDAG_03845 [Verticillium dahliae VdLs.17]
Vd01G0910	3111567	3112767	+	endoplasmic reticulum mannosyl-oligosaccharide 1,2-alpha-mannosidase [Verticillium dahliae VdLs.17]
Vd01G0984	3317495	3320925	+	exopolygalacturonase [Verticillium dahliae VdLs.17]
Vd01G0986	3323460	3324790	+	fungal cellulose binding domain-containing protein [Verticillium dahliae VdLs.17]
Vd01G1000	3362008	3366548	-	polygalacturonase [Verticillium dahliae VdLs.17]
Vd01G1009	3405112	3413978	-	hypothetical protein VDAG_06148 [Verticillium dahliae VdLs.17]
Vd01G1017	3431201	3432389	-	malate dehydrogenase [Verticillium alfalfae VaMs.102]
Vd01G1029	3465827	3466329	-	feruloyl esterase B [Verticillium dahliae VdLs.17]
Vd01G1034	3485002	3488633	+	glucan 1,3-beta-glucosidase [Verticillium dahliae VdLs.17]
Vd01G1061	3579784	3582766	-	hypothetical protein VDAG_07972 [Verticillium dahliae VdLs.17]
Vd01G1072	3602027	3602425	+	endoglucanase-4 [Verticillium dahliae VdLs.17]
Vd01G1111	3762650	3765295	-	LysM domain-containing protein [Verticillium dahliae VdLs.17]
Vd01G1112	3766404	3768172	+	hypothetical protein VDAG_03441 [Verticillium dahliae VdLs.17]
Vd01G1113	3768476	3770307	-	disulfide isomerase [Verticillium dahliae VdLs.17]
Vd01G1114	3770390	3772058	+	feruloyl esterase B [Verticillium dahliae VdLs.17]
Vd01G1116	3773977	3776883	+	hypothetical protein VDAG_03382 [Verticillium dahliae VdLs.17]
Vd01G1117	3779193	3779460	+	catalase-3 [Verticillium dahliae VdLs.17]
Vd01G1133	3834404	3834943	-	hypothetical protein VDAG_01151 [Verticillium dahliae VdLs.17]
Vd01G1150	3883128	3884474	-	glucosidase 2 subunit beta [Verticillium dahliae VdLs.17]
Vd01G1159	3899208	3903254	-	ser/Thr protein phosphatase family [Verticillium dahliae VdLs.17]
Vd01G1165	3920735	3921625	+	carboxypeptidase S1 [Verticillium dahliae VdLs.17]
Vd01G1167	3924509	3926294	+	FAD binding domain-containing protein [Verticillium dahliae VdLs.17]
Vd01G1176	3973270	3979716	+	DnaJ and TPR domain-containing protein [Verticillium dahliae VdLs.17]
Vd01G1178	3980588	3984847	+	hypothetical protein VDAG_09678 [Verticillium dahliae VdLs.17]
Vd01G1189	4005722	4007366	-	hypothetical protein VDAG_04830 [Verticillium dahliae VdLs.17]
Vd01G1192	4014433	4017674	+	hypothetical protein VDAG_04110 [Verticillium dahliae VdLs.17]
Vd01G1211	4076771	4077987	+	lipolytic enzyme [Verticillium dahliae VdLs.17]
Vd01G1214	4087241	4088763	-	L-amino-acid oxidase [Verticillium dahliae VdLs.17]
Vd01G1221	4100088	4103180	-	peroxidase/catalase [Verticillium dahliae VdLs.17]
Vd01G1231	4139259	4140453	+	epoxide hydrolase [Verticillium dahliae VdLs.17]
Vd01G1251	4197791	4199548	+	hypothetical protein VDAG_07379 [Verticillium dahliae VdLs.17]
Vd01G1260	4219872	4222583	+	glycoside hydrolase [Verticillium dahliae VdLs.17]
Vd01G1263	4234991	4240643	+	feruloyl esterase B [Verticillium dahliae VdLs.17]
Vd01G1276	4283188	4284771	+	LysM domain-containing protein [Verticillium dahliae VdLs.17]
Vd01G1279	4290582	4291394	-	ABC transporter [Verticillium alfalfae VaMs.102]
Vd01G1281	4294133	4297849	-	hypothetical protein VDAG_02906 [Verticillium dahliae VdLs.17]
Vd01G1287	4312469	4315567	-	FG-GAP repeat domain-containing protein [Verticillium alfalfae VaMs.102]
Vd01G1291	4326789	4327850	+	thermostable beta-glucosidase B [Verticillium dahliae VdLs.17]
Vd01G1297	4348690	4356896	-	hypothetical protein VDAG_07958 [Verticillium dahliae VdLs.17]
Vd01G1305	4377851	4379556	-	MAS1 protein [Verticillium dahliae VdLs.17]
Vd01G1307	4383283	4383842	-	chitinase [Verticillium dahliae VdLs.17]
Vd01G1337	4463207	4463548	+	hypothetical protein VDAG_03499 [Verticillium dahliae VdLs.17]
Vd01G1365	4570007	4573493	-	alpha-amylase A type-1/2 [Verticillium dahliae VdLs.17]
Vd01G1367	4575721	4579724	-	ferulic acid esterase A [Verticillium dahliae VdLs.17]
Vd01G1376	4604111	4604585	-	periplasmic trehalase [Verticillium dahliae VdLs.17]
Vd01G1383	4623076	4625921	-	hypothetical protein VDAG_03377 [Verticillium dahliae VdLs.17]
Vd01G1395	4670171	4671577	-	peptide-N4-(N-acetyl-beta-glucosaminyl)asparagine amidase A [Verticillium dahliae VdLs.17]
Vd01G1401	4683987	4686788	-	hypothetical protein VDAG_00621 [Verticillium dahliae VdLs.17]
Vd01G1402	4688966	4691891	-	cellulose-growth-specific protein [Verticillium dahliae VdLs.17]
Vd01G1420	4734230	4738856	+	pectinesterase [Verticillium dahliae VdLs.17]
Vd01G1422	4741655	4744402	-	candidapepsin-2 [Verticillium dahliae VdLs.17]
Vd01G1424	4748148	4749820	-	hypothetical protein VDAG_07139 [Verticillium dahliae VdLs.17]
Vd01G1434	4791658	4795986	-	hypothetical protein VDAG_02256 [Verticillium dahliae VdLs.17]
Vd01G1436	4798432	4798931	+	secreted protein [Verticillium dahliae VdLs.17]
Vd01G1458	4877978	4878460	+	hypothetical protein VDAG_02230 [Verticillium dahliae VdLs.17]
Vd01G1472	4927898	4931328	+	hypothetical protein VDAG_00900 [Verticillium dahliae VdLs.17]
Vd01G1482	4957502	4958235	+	hypothetical protein VDAG_03312 [Verticillium dahliae VdLs.17]
Vd01G1503	5028241	5029077	-	hypothetical protein VDAG_04109 [Verticillium dahliae VdLs.17]
Vd01G1504	5030603	5033888	+	hypothetical protein VDAG_09853 [Verticillium dahliae VdLs.17]
Vd01G1505	5034065	5038011	+	hypothetical protein VDAG_08499 [Verticillium dahliae VdLs.17]
Vd01G1506	5038246	5038757	+	hypothetical protein VDAG_03405 [Verticillium dahliae VdLs.17]
Vd01G1528	5092531	5093217	-	hypothetical protein VDAG_07393 [Verticillium dahliae VdLs.17]
Vd01G1533	5099605	5100156	-	hypothetical protein VDAG_04506 [Verticillium dahliae VdLs.17]
Vd01G1604	5285683	5287044	+	hypothetical protein VDAG_03653 [Verticillium dahliae VdLs.17]
Vd01G1612	5317533	5319017	-	conserved hypothetical protein [Verticillium alfalfae VaMs.102]
Vd01G1639	5417886	5422896	+	glycosyl hydrolase family 43 protein [Verticillium dahliae VdLs.17]
Vd01G1653	5473239	5474651	+	conserved hypothetical protein [Verticillium alfalfae VaMs.102]
Vd01G1660	5488970	5489885	-	oxidoreductase [Verticillium dahliae VdLs.17]
Vd01G1663	5501662	5504539	-	hypothetical protein VDAG_04006 [Verticillium dahliae VdLs.17]
Vd01G1670	5518217	5519184	+	hypothetical protein VDAG_03287 [Verticillium dahliae VdLs.17]
Vd01G1679	5546168	5547544	-	conserved hypothetical protein [Verticillium alfalfae VaMs.102]
Vd01G1716	5657172	5660146	-	tripeptidyl-peptidase [Verticillium dahliae VdLs.17]
Vd01G1723	5676010	5677720	-	hypothetical protein VDAG_01838 [Verticillium dahliae VdLs.17]
Vd01G1735	5727519	5728159	-	carboxypeptidase B [Verticillium dahliae VdLs.17]
Vd01G1759	5815526	5816971	-	acetyl-lysine deacetylase [Verticillium dahliae VdLs.17]
Vd01G1769	5855963	5859649	-	hypothetical protein VDAG_00206 [Verticillium dahliae VdLs.17]
Vd01G1770	5861343	5862256	-	cutinase [Verticillium dahliae VdLs.17]
Vd01G1771	5863434	5865391	+	nuclease P1 [Verticillium dahliae VdLs.17]
Vd01G1823	6012760	6016037	-	alkaline phosphatase H [Verticillium dahliae VdLs.17]
Vd01G1848	6083444	6085966	+	leucyl aminopeptidase [Verticillium dahliae VdLs.17]
Vd01G1861	6122551	6124354	-	beta-glucosidase [Verticillium dahliae VdLs.17]
Vd01G1863	6128518	6131349	-	carboxypeptidase A [Verticillium dahliae VdLs.17]
Vd01G1874	6160024	6163147	-	conserved hypothetical protein [Verticillium alfalfae VaMs.102]
Vd01G1880	6182550	6183965	-	carboxylesterase [Verticillium dahliae VdLs.17]
Vd01G1886	6204205	6209809	-	chitin binding protein [Verticillium dahliae VdLs.17]
Vd01G1889	6221751	6224913	-	endopolyphosphatase [Verticillium dahliae VdLs.17]
Vd01G1899	6268200	6269263	-	exoglucanase [Verticillium dahliae VdLs.17]
Vd01G1902	6275541	6276373	+	subtilisin-like serine protease [Verticillium dahliae]
Vd01G1905	6281994	6283113	+	cutinase [Verticillium dahliae VdLs.17]
Vd01G1935	6391605	6399413	-	none
Vd01G1937	6401777	6407495	+	hypothetical protein VDAG_04736 [Verticillium dahliae VdLs.17]
Vd01G1952	6454572	6460075	-	endothiapepsin [Verticillium dahliae VdLs.17]
Vd01G1960	6481363	6484446	+	hypothetical protein VDAG_10507 [Verticillium dahliae VdLs.17]
Vd01G1966	6495031	6496429	+	hypothetical protein VDAG_02735 [Verticillium dahliae VdLs.17]
Vd01G1977	6527419	6528399	-	DJ-1/PfpI family protein [Verticillium dahliae VdLs.17]
Vd01G2014	6665457	6666143	-	hypothetical protein VDAG_07742 [Verticillium dahliae VdLs.17]
Vd01G2021	6679603	6683017	+	translation initiation inhibitor [Verticillium dahliae VdLs.17]
Vd01G2026	6692036	6697503	-	laccase-1 [Verticillium dahliae VdLs.17]
Vd01G2044	6738955	6740335	+	choline dehydrogenase [Verticillium dahliae VdLs.17]
Vd01G2051	6758665	6759264	+	hypothetical protein VDAG_09656 [Verticillium dahliae VdLs.17]
Vd01G2062	6787002	6791127	+	lectin [Verticillium alfalfae VaMs.102]
Vd01G2064	6792229	6792960	+	hypothetical protein VDAG_08558 [Verticillium dahliae VdLs.17]
Vd01G2080	6851119	6853479	-	hypothetical protein VDAG_03011 [Verticillium dahliae VdLs.17]
Vd01G2100	6907849	6909639	-	prenylcysteine oxidase [Verticillium dahliae VdLs.17]
Vd01G2104	6915056	6915979	-	hypothetical protein VDAG_02590 [Verticillium dahliae VdLs.17]
Vd01G2110	6947482	6950271	+	hypothetical protein VDAG_00830 [Verticillium dahliae VdLs.17]
Vd01G2112	6956138	6956800	+	predicted protein [Verticillium alfalfae VaMs.102]
Vd01G2118	6967922	6971704	-	hypothetical protein VDAG_08248 [Verticillium dahliae VdLs.17]
Vd01G2152	7093444	7095081	-	hypothetical protein VDAG_04737 [Verticillium dahliae VdLs.17]
Vd01G2170	7141674	7143719	-	hypothetical protein CFIO01_07793 [Colletotrichum fioriniae PJ7]
Vd01G2185	7193019	7194697	-	metal dependent amidohydrolase [Verticillium dahliae VdLs.17]
Vd01G2186	7195084	7195686	+	glutamine-dependent NAD synthetase [Verticillium dahliae VdLs.17]
Vd01G2187	7196100	7197671	-	carboxypeptidase S1 [Verticillium dahliae VdLs.17]
Vd01G2198	7228126	7232050	+	hypothetical protein VDAG_02807 [Verticillium dahliae VdLs.17]
Vd01G2211	7262182	7265196	+	hypothetical protein VDAG_07297 [Verticillium dahliae VdLs.17]
Vd01G2217	7282137	7282760	+	endo-1,4-beta-xylanase A [Verticillium dahliae VdLs.17]
Vd01G2231	7357556	7358146	-	extracellular cell wall glucanase Crf1 [Verticillium dahliae VdLs.17]
Vd01G2233	7359940	7361812	+	cutinase-2 [Verticillium alfalfae VaMs.102]
Vd01G2248	7395419	7397536	-	alpha-galactosidase [Verticillium dahliae VdLs.17]
Vd01G2249	7398180	7411094	-	hypothetical protein VDAG_10515 [Verticillium dahliae VdLs.17]
Vd01G2262	7438287	7439697	+	hypothetical protein VDAG_06637 [Verticillium dahliae VdLs.17]
Vd01G2275	7468289	7471632	+	nuclease S1 [Verticillium dahliae VdLs.17]
Vd01G2319	7580615	7581844	+	hypothetical protein VDAG_06227 [Verticillium dahliae VdLs.17]
Vd01G2321	7582893	7584878	+	FCY1p [Verticillium dahliae VdLs.17]
Vd01G2325	7603216	7604280	+	hypothetical protein VDAG_07525 [Verticillium dahliae VdLs.17]
Vd01G2326	7607065	7607363	+	palmitoyl-protein thioesterase [Verticillium dahliae VdLs.17]
Vd01G2342	7641021	7641989	-	hypothetical protein VDAG_00579 [Verticillium dahliae VdLs.17]
Vd01G2375	7725377	7727548	-	hypothetical protein VDAG_03704 [Verticillium dahliae VdLs.17]
Vd01G2377	7729264	7729562	-	hypothetical protein VDAG_07674 [Verticillium dahliae VdLs.17]
Vd01G2380	7732702	7733246	+	rhamnogalacturonan lyase [Verticillium dahliae VdLs.17]
Vd01G2398	7773160	7775477	+	hypothetical protein VDAG_02044 [Verticillium dahliae VdLs.17]
Vd01G2400	7776732	7779954	-	cell wall protein PhiA [Verticillium dahliae VdLs.17]
Vd01G2411	7824641	7825702	+	protein-arginine deiminase type-4 [Verticillium dahliae VdLs.17]
Vd02G0004	171513	173849	-	endo-1,4-beta-xylanase Z [Verticillium alfalfae VaMs.102]
Vd02G0015	207390	209618	-	WSC domain-containing protein [Verticillium dahliae VdLs.17]
Vd02G0017	214150	216140	-	beta-galactosidase [Verticillium dahliae VdLs.17]
Vd02G0018	216913	224413	-	conserved hypothetical protein [Verticillium alfalfae VaMs.102]
Vd02G0032	279073	283438	+	carbohydrate esterase family 8 protein [Aureobasidium subglaciale EXF-2481]
Vd02G0038	292531	297188	-	predicted protein [Verticillium alfalfae VaMs.102]
Vd02G0049	326162	329835	-	exoglucanase [Verticillium dahliae VdLs.17]
Vd02G0053	335072	336907	-	predicted protein [Verticillium alfalfae VaMs.102]
Vd02G0062	367409	369834	-	CAS1 protein [Verticillium dahliae VdLs.17]
Vd02G0065	379948	381714	-	hypothetical protein VDAG_09555 [Verticillium dahliae VdLs.17]
Vd02G0105	515730	516167	-	conserved hypothetical protein [Verticillium alfalfae VaMs.102]
Vd02G0106	516614	518410	+	alpha-glucuronidase [Verticillium dahliae VdLs.17]
Vd02G0114	543895	545362	-	polygalacturonase [Verticillium dahliae VdLs.17]
Vd02G0161	662537	663356	-	hypothetical protein VDAG_06561 [Verticillium dahliae VdLs.17]
Vd02G0185	724613	725612	-	hypothetical protein VDAG_03815 [Verticillium dahliae VdLs.17]
Vd02G0213	806638	809640	-	hypothetical protein VDAG_05061 [Verticillium dahliae VdLs.17]
Vd02G0215	816588	817012	+	hypothetical protein VDAG_00958 [Verticillium dahliae VdLs.17]
Vd02G0220	830411	832294	-	hypothetical protein VDAG_04433 [Verticillium dahliae VdLs.17]
Vd02G0221	831810	832934	+	amidase [Colletotrichum higginsianum]
Vd02G0224	837723	839947	+	glucan 1,3-beta-glucosidase [Verticillium dahliae VdLs.17]
Vd02G0227	845712	846936	+	hypothetical protein VDAG_04155 [Verticillium dahliae VdLs.17]
Vd02G0269	999027	999638	+	none
Vd02G0275	1021944	1022654	-	hypothetical protein VDAG_00636 [Verticillium dahliae VdLs.17]
Vd02G0296	1107477	1108772	-	lysozyme [Verticillium dahliae VdLs.17]
Vd02G0303	1135589	1138033	-	amine oxidase [Verticillium dahliae VdLs.17]
Vd02G0312	1170685	1173446	+	hypothetical protein VDAG_02343 [Verticillium dahliae VdLs.17]
Vd02G0314	1177888	1178184	-	hypothetical protein VDAG_10076 [Verticillium dahliae VdLs.17]
Vd02G0330	1216995	1218231	-	FAD binding domain-containing protein [Verticillium dahliae VdLs.17]
Vd02G0355	1449437	1451282	-	hypothetical protein VDAG_07370 [Verticillium dahliae VdLs.17]
Vd02G0374	1513439	1516617	-	hypothetical protein VDAG_08211 [Verticillium dahliae VdLs.17]
Vd02G0375	1513559	1513942	+	hypothetical protein VDAG_03755 [Verticillium dahliae VdLs.17]
Vd02G0386	1555523	1556947	-	conserved hypothetical protein [Verticillium alfalfae VaMs.102]
Vd02G0391	1575688	1576270	+	hypothetical protein VDAG_04405 [Verticillium dahliae VdLs.17]
Vd02G0396	1587817	1589016	-	beta-glucosidase [Verticillium dahliae VdLs.17]
Vd02G0410	1643573	1644928	-	endonuclease/exonuclease/phosphatase family [Verticillium dahliae VdLs.17]
Vd02G0415	1652438	1653761	+	FAD binding domain-containing protein [Verticillium dahliae VdLs.17]
Vd02G0416	1655726	1657074	-	hypothetical protein VDAG_09860 [Verticillium dahliae VdLs.17]
Vd02G0452	1762181	1763517	+	protein kinase domain-containing protein [Verticillium dahliae VdLs.17]
Vd02G0457	1778043	1779416	-	chitinase 18-4 [Verticillium dahliae VdLs.17]
Vd02G0463	1790000	1792048	+	conserved hypothetical protein [Verticillium alfalfae VaMs.102]
Vd02G0467	1799029	1802583	-	hypothetical protein VDAG_07927 [Verticillium dahliae VdLs.17]
Vd02G0483	1839602	1840549	+	endoglucanase-4 [Verticillium dahliae VdLs.17]
Vd02G0493	1871410	1873035	+	hypothetical protein VDAG_00070 [Verticillium dahliae VdLs.17]
Vd02G0498	1886621	1888203	-	hypothetical protein VDAG_07100 [Verticillium dahliae VdLs.17]
Vd02G0511	1917023	1918950	-	predicted protein [Verticillium alfalfae VaMs.102]
Vd02G0532	1982835	1985012	+	putative asparaginase [Colletotrichum sublineola]
Vd02G0534	1986566	1987705	+	endoglucanase EG-1 [Verticillium dahliae VdLs.17]
Vd02G0540	2015094	2020067	+	hypothetical protein VDAG_02752 [Verticillium dahliae VdLs.17]
Vd02G0547	2081688	2084883	+	hypothetical protein VDAG_05652 [Verticillium dahliae VdLs.17]
Vd02G0557	2113492	2114184	-	hypothetical protein VDAG_04291 [Verticillium dahliae VdLs.17]
Vd02G0562	2131253	2133161	-	beta-Ig-H3/Fasciclin [Verticillium dahliae VdLs.17]
Vd02G0588	2242733	2244024	+	alpha-N-arabinofuranosidase [Verticillium dahliae VdLs.17]
Vd02G0604	2318863	2322172	-	hypothetical protein VDAG_04057 [Verticillium dahliae VdLs.17]
Vd02G0614	2349073	2352489	+	GTPase-activating protein GYP7 [Verticillium dahliae VdLs.17]
Vd02G0625	2380809	2384069	-	polygalacturonase [Verticillium dahliae VdLs.17]
Vd02G0630	2402165	2409193	+	hypothetical protein VDAG_07171 [Verticillium dahliae VdLs.17]
Vd02G0680	2583020	2589722	-	hypothetical protein VDAG_08202 [Verticillium dahliae VdLs.17]
Vd02G0691	2637401	2640035	+	beta-fructofuranosidase [Verticillium dahliae VdLs.17]
Vd02G0710	2685606	2687593	+	hypothetical protein VDAG_03804 [Verticillium dahliae VdLs.17]
Vd02G0718	2722012	2723556	-	hypothetical protein CGLO_08867 [Colletotrichum gloeosporioides Cg-14]
Vd02G0722	2733990	2736813	+	necrosis- and ethylene-inducing protein [Verticillium dahliae VdLs.17]
Vd02G0733	2772746	2774079	+	acetylcholinesterase [Verticillium dahliae VdLs.17]
Vd02G0735	2776921	2778681	+	hypothetical protein VDAG_07662 [Verticillium dahliae VdLs.17]
Vd02G0752	2825838	2826819	-	acetylxylan esterase [Verticillium dahliae VdLs.17]
Vd02G0770	2885486	2885882	-	starch binding domain-containing protein [Verticillium alfalfae VaMs.102]
Vd02G0771	2929279	2931740	-	hypothetical protein VDAG_02920 [Verticillium dahliae VdLs.17]
Vd02G0772	2930963	2934414	+	acetylxylan esterase [Verticillium dahliae VdLs.17]
Vd02G0790	2981066	2982268	-	aminopeptidase Y [Verticillium dahliae VdLs.17]
Vd02G0822	3157012	3158980	+	serin endopeptidase [Verticillium dahliae VdLs.17]
Vd02G0826	3168041	3168601	+	endoglucanase-4 [Verticillium dahliae VdLs.17]
Vd02G0905	3565583	3569717	+	26S protease regulatory subunit 4 [Verticillium alfalfae VaMs.102]
Vd02G0908	3576918	3578392	+	hypothetical protein VDAG_08183 [Verticillium dahliae VdLs.17]
Vd02G0913	3584331	3585619	+	hypothetical protein VDAG_01047 [Verticillium dahliae VdLs.17]
Vd02G0924	3611766	3612306	-	secreted protein [Verticillium alfalfae VaMs.102]
Vd02G0925	3612636	3614009	-	hypothetical protein VDAG_01806 [Verticillium dahliae VdLs.17]
Vd02G0930	3624567	3629181	-	FAS1 domain-containing protein [Verticillium dahliae VdLs.17]
Vd02G0933	3632855	3633418	+	beta-galactosidase [Verticillium alfalfae VaMs.102]
Vd02G0935	3635378	3636477	+	twin-arginine translocation pathway signal [Colletotrichum orbiculare MAFF 240422]
Vd02G0964	3729560	3732524	+	hypothetical protein VDAG_06516 [Verticillium dahliae VdLs.17]
Vd02G0976	3761584	3762968	+	hypothetical protein VDAG_00035 [Verticillium dahliae VdLs.17]
Vd02G0980	3789985	3794934	-	surface protein [Verticillium dahliae VdLs.17]
Vd02G1013	3881046	3884666	+	lipase [Verticillium dahliae VdLs.17]
Vd02G1016	3892754	3893323	+	glycolipid 2-alpha-mannosyltransferase [Verticillium alfalfae VaMs.102]
Vd02G1032	3938520	3942315	-	hypothetical protein VDAG_07394 [Verticillium dahliae VdLs.17]
Vd02G1042	3964478	3966430	-	hypothetical protein VDAG_05439 [Verticillium dahliae VdLs.17]
Vd02G1045	3976418	3978446	+	cation-transporting ATPase pacS [Verticillium alfalfae VaMs.102]
Vd02G1048	3988016	3993202	+	glycoside hydrolase [Verticillium dahliae VdLs.17]
Vd02G1055	4014457	4017565	+	hypothetical protein VDAG_02770 [Verticillium dahliae VdLs.17]
Vd02G1058	4023589	4024883	-	bilirubin oxidase [Verticillium dahliae VdLs.17]
Vd02G1061	4033817	4035728	+	DNase1 protein [Colletotrichum gloeosporioides Nara gc5]
Vd02G1073	4071401	4072093	-	FAD binding domain-containing protein [Verticillium dahliae VdLs.17]
Vd02G1075	4074082	4075895	+	oxalate decarboxylase oxdC [Verticillium dahliae VdLs.17]
Vd02G1080	4091589	4092646	+	Cel74a [Verticillium dahliae VdLs.17]
Vd02G1082	4098173	4102737	+	hypothetical protein VDAG_01595 [Verticillium dahliae VdLs.17]
Vd02G1107	4188348	4195919	+	beta-glucanase [Verticillium dahliae VdLs.17]
Vd02G1132	4285445	4291944	-	endochitinase [Verticillium dahliae VdLs.17]
Vd02G1146	4328367	4330009	+	cutinase [Verticillium dahliae VdLs.17]
Vd02G1159	4361579	4365652	-	glucose oxidase [Verticillium dahliae VdLs.17]
Vd02G1167	4413781	4416358	-	cellulose-growth-specific protein [Verticillium dahliae VdLs.17]
Vd02G1215	4562379	4562811	+	phosphorylcholine phosphatase [Verticillium dahliae VdLs.17]
Vd02G1262	4729388	4731771	+	endo-1,4-beta-xylanase [Verticillium dahliae VdLs.17]
Vd02G1270	4754967	4756334	-	FAD/FMN-containing dehydrogenase [Verticillium dahliae VdLs.17]
Vd02G1274	4765215	4765475	-	hypothetical protein VDAG_07641 [Verticillium dahliae VdLs.17]
Vd02G1284	4788574	4790068	-	metalloprotease [Verticillium dahliae VdLs.17]
Vd02G1304	4858575	4861369	-	hypothetical protein VDAG_02640 [Verticillium dahliae VdLs.17]
Vd02G1313	4876479	4878417	-	hypothetical protein VDAG_08037 [Verticillium dahliae VdLs.17]
Vd02G1324	4912742	4914285	+	hexaprenyldihydroxybenzoate methyltransferase [Verticillium alfalfae VaMs.102]
Vd02G1328	4939207	4943545	+	hypothetical protein VDAG_07701 [Verticillium dahliae VdLs.17]
Vd02G1331	4949251	4949557	+	neuroligin-4 [Verticillium dahliae VdLs.17]
Vd02G1337	4970443	4970649	+	mixed-linked glucanase [Verticillium dahliae VdLs.17]
Vd02G1348	5001771	5004631	+	hypothetical protein VDAG_09058 [Verticillium dahliae VdLs.17]
Vd02G1366	5065686	5068639	+	none
Vd02G1373	5083034	5084726	-	hypothetical protein VDAG_05183 [Verticillium dahliae VdLs.17]
Vd02G1378	5096619	5099981	+	YesU [Verticillium dahliae VdLs.17]
Vd02G1385	5118535	5120028	+	hypothetical protein VDBG_06323 [Verticillium alfalfae VaMs.102]
Vd02G1396	5149629	5150265	+	predicted protein [Verticillium alfalfae VaMs.102]
Vd03G0023	195399	196397	+	tyrosinase [Verticillium dahliae VdLs.17]
Vd03G0036	238801	239331	+	carbonic anhydrase [Verticillium dahliae VdLs.17]
Vd03G0049	276874	277550	-	hypothetical protein VDAG_01155 [Verticillium dahliae VdLs.17]
Vd03G0052	287220	288443	-	hypothetical protein VDAG_01298 [Verticillium dahliae VdLs.17]
Vd03G0071	343756	347128	+	carboxylesterase [Verticillium alfalfae VaMs.102]
Vd03G0084	401453	401909	+	transmembrane emp24 domain-containing protein [Verticillium dahliae VdLs.17]
Vd03G0099	436415	437622	-	carboxypeptidase Y [Verticillium alfalfae VaMs.102]
Vd03G0116	487855	488572	+	hypothetical protein VDAG_06780 [Verticillium dahliae VdLs.17]
Vd03G0127	521204	524263	-	glucanase B [Verticillium dahliae VdLs.17]
Vd03G0148	591019	592365	+	polyamine oxidase [Verticillium dahliae VdLs.17]
Vd03G0160	623678	624293	+	exo-rhamnogalacturonase B [Verticillium dahliae VdLs.17]
Vd03G0182	690271	691233	+	hypothetical protein VDAG_05090 [Verticillium dahliae VdLs.17]
Vd03G0188	702791	704804	-	cellulose-growth-specific protein [Verticillium dahliae VdLs.17]
Vd03G0201	742241	743583	+	sulphydryl oxidase [Verticillium dahliae VdLs.17]
Vd03G0215	782318	785064	-	GPI-anchor transamidase [Verticillium dahliae VdLs.17]
Vd03G0220	797469	801473	-	alpha-N-arabinofuranosidase [Verticillium dahliae VdLs.17]
Vd03G0246	867469	874295	-	FAD binding domain-containing protein [Verticillium dahliae VdLs.17]
Vd03G0250	878471	880120	+	keratin-associated protein 10-7 [Verticillium dahliae VdLs.17]
Vd03G0252	881464	885707	-	hypothetical protein VDAG_05315 [Verticillium dahliae VdLs.17]
Vd03G0261	909166	911221	+	alpha/beta hydrolase [Verticillium dahliae VdLs.17]
Vd03G0283	970304	974199	-	alpha-L-rhamnosidase A [Verticillium dahliae VdLs.17]
Vd03G0286	981368	981700	+	hypothetical protein VDAG_09319 [Verticillium dahliae VdLs.17]
Vd03G0300	1011077	1013000	-	carbonic anhydrase [Verticillium dahliae VdLs.17]
Vd03G0311	1039748	1040794	-	peptidase M28 [Verticillium dahliae VdLs.17]
Vd03G0321	1076277	1077679	+	aminopeptidase Y [Verticillium dahliae VdLs.17]
Vd03G0326	1089842	1090937	-	hypothetical protein VDAG_05421 [Verticillium dahliae VdLs.17]
Vd03G0328	1093895	1095348	-	subtilisin BPN&apos; [Verticillium alfalfae VaMs.102]
Vd03G0333	1108710	1111066	+	hypothetical protein VDAG_07682 [Verticillium dahliae VdLs.17]
Vd03G0349	1165407	1168492	-	hypothetical protein VDAG_07858 [Verticillium dahliae VdLs.17]
Vd03G0357	1193169	1194783	-	hypothetical protein VDAG_07212 [Verticillium dahliae VdLs.17]
Vd03G0360	1213632	1214893	-	hypothetical protein VDAG_08213 [Verticillium dahliae VdLs.17]
Vd03G0376	1267874	1269060	-	pectate lyase [Verticillium dahliae VdLs.17]
Vd03G0382	1284397	1285048	+	hypothetical protein VDAG_09383 [Verticillium dahliae VdLs.17]
Vd03G0391	1320479	1322562	+	hypothetical protein VDAG_01054 [Verticillium dahliae VdLs.17]
Vd03G0392	1323097	1323621	+	arylsulfatase [Verticillium dahliae VdLs.17]
Vd03G0396	1340599	1341788	+	hypothetical protein VDAG_03742, partial [Verticillium dahliae VdLs.17]
Vd03G0398	1347532	1348195	-	hypothetical protein VDAG_03190 [Verticillium dahliae VdLs.17]
Vd03G0424	1419923	1421083	+	glucan 1,3-beta-glucosidase [Verticillium dahliae VdLs.17]
Vd03G0447	1492835	1493830	-	hypothetical protein VDAG_00482 [Verticillium dahliae VdLs.17]
Vd03G0454	1525963	1527680	+	hypothetical protein VDAG_06258 [Verticillium dahliae VdLs.17]
Vd03G0455	1528391	1529719	+	hypothetical protein VDAG_03709 [Verticillium dahliae VdLs.17]
Vd03G0458	1533478	1534179	-	oxalate decarboxylase oxdD [Verticillium dahliae VdLs.17]
Vd03G0465	1554116	1555234	-	carboxypeptidase S1 [Verticillium alfalfae VaMs.102]
Vd03G0494	1654004	1654902	+	hypothetical protein VDAG_07113 [Verticillium dahliae VdLs.17]
Vd03G0499	1663027	1666763	+	hypothetical protein VDAG_04228 [Verticillium dahliae VdLs.17]
Vd03G0501	1668664	1669544	-	pectate lyase L [Verticillium dahliae VdLs.17]
Vd03G0502	1669990	1672371	+	hypothetical protein VDAG_08579 [Verticillium dahliae VdLs.17]
Vd03G0512	1700727	1702241	-	hypothetical protein UCRPA7_1063 [Togninia minima UCRPA7]
Vd03G0519	1713385	1717559	-	predicted protein [Verticillium alfalfae VaMs.102]
Vd03G0535	1760632	1761678	-	carboxylesterase [Verticillium dahliae VdLs.17]
Vd03G0547	1827380	1830534	-	aminopeptidase Y [Verticillium dahliae VdLs.17]
Vd03G0563	1870621	1871218	-	1,3-beta-glucanosyltransferase gel2 [Verticillium alfalfae VaMs.102]
Vd03G0566	1880497	1883158	-	hypothetical protein VDAG_01231 [Verticillium dahliae VdLs.17]
Vd03G0573	1926767	1927602	+	hypothetical protein VDAG_08500 [Verticillium dahliae VdLs.17]
Vd03G0581	1951665	1955174	+	metalloprotease [Verticillium dahliae VdLs.17]
Vd03G0609	2039581	2050805	-	hypothetical protein VDAG_09363 [Verticillium dahliae VdLs.17]
Vd03G0610	2051719	2056568	-	methionine-r-sulfoxide reductase [Colletotrichum gloeosporioides Nara gc5]
Vd03G0618	2074925	2075600	-	pectin lyase [Verticillium dahliae VdLs.17]
Vd03G0643	2194650	2197454	-	WSC domain-containing protein [Verticillium alfalfae VaMs.102]
Vd03G0650	2212793	2215110	-	hypothetical protein VDAG_06930 [Verticillium dahliae VdLs.17]
Vd03G0654	2231490	2241550	-	small COPII coat GTPase SAR1 [Verticillium alfalfae VaMs.102]
Vd03G0656	2246476	2247254	-	chitin deacetylase [Verticillium dahliae VdLs.17]
Vd03G0673	2289207	2291525	+	hypothetical protein VDAG_02463 [Verticillium dahliae VdLs.17]
Vd03G0721	2627449	2628716	+	FAD binding domain-containing protein [Verticillium dahliae VdLs.17]
Vd03G0726	2639704	2640858	-	SnodProt1 [Verticillium dahliae VdLs.17]
Vd03G0739	2675362	2677765	+	hypothetical protein VDAG_06088 [Verticillium dahliae VdLs.17]
Vd03G0745	2687369	2690363	+	endosomal protein P24B [Verticillium dahliae VdLs.17]
Vd03G0760	2736620	2739570	+	extracellular serine-threonine rich protein [Colletotrichum orbiculare MAFF 240422]
Vd03G0796	2853634	2855046	+	carbonate dehydratase [Verticillium dahliae VdLs.17]
Vd03G0803	2878907	2880139	+	chitin deacetylase [Verticillium dahliae VdLs.17]
Vd03G0807	2890854	2891591	-	hypothetical protein VDAG_05971 [Verticillium dahliae VdLs.17]
Vd03G0819	2929283	2930999	+	endo-1,4-beta-xylanase [Verticillium dahliae VdLs.17]
Vd03G0838	2977807	2978489	+	cellulose-growth-specific protein [Verticillium alfalfae VaMs.102]
Vd03G0857	3028171	3028692	+	metalloproteinase [Verticillium dahliae VdLs.17]
Vd03G0885	3124584	3128379	+	hypothetical protein VDAG_03799 [Verticillium dahliae VdLs.17]
Vd03G0898	3167719	3168691	-	hypothetical protein VDAG_07287 [Verticillium dahliae VdLs.17]
Vd03G0900	3171164	3174581	+	disulfide-isomerase erp38 [Verticillium dahliae VdLs.17]
Vd03G0928	3258287	3260872	-	hypothetical protein VDAG_07195 [Verticillium dahliae VdLs.17]
Vd03G0950	3312979	3316256	+	hypothetical protein VDAG_08672 [Verticillium dahliae VdLs.17]
Vd03G0966	3364411	3368980	-	hypothetical protein VDAG_02016 [Verticillium dahliae VdLs.17]
Vd03G0970	3378298	3378835	-	hypothetical protein VDAG_05183 [Verticillium dahliae VdLs.17]
Vd03G0972	3385489	3386112	-	subtilisin Carlsberg [Verticillium dahliae VdLs.17]
Vd03G0980	3412686	3413611	+	DNA repair and recombination protein pif1 [Verticillium dahliae VdLs.17]
Vd03G0994	3610551	3613733	+	UTR2 protein [Verticillium dahliae VdLs.17]
Vd03G1008	3662210	3662818	-	hypothetical protein VDAG_05648 [Verticillium dahliae VdLs.17]
Vd03G1034	3769570	3771048	-	repressible alkaline phosphatase [Verticillium alfalfae VaMs.102]
Vd03G1043	3804947	3806844	-	amidohydrolase family protein [Verticillium alfalfae VaMs.102]
Vd03G1048	3822189	3824901	-	flocculation suppression protein [Verticillium alfalfae VaMs.102]
Vd03G1050	3828156	3834223	+	ECM14 protein [Verticillium dahliae VdLs.17]
Vd03G1056	3850334	3851996	-	endoglucanase-1 [Verticillium alfalfae VaMs.102]
Vd03G1059	3857105	3858431	+	mannan endo-1,4-beta-mannosidase [Verticillium dahliae VdLs.17]
Vd03G1075	3902818	3904862	+	hypothetical protein VDAG_02125 [Verticillium dahliae VdLs.17]
Vd03G1096	3967805	3968775	-	hypothetical protein VDAG_07772 [Verticillium dahliae VdLs.17]
Vd03G1097	3969776	3970490	-	hypothetical protein VDAG_05641 [Verticillium dahliae VdLs.17]
Vd03G1108	4060243	4061142	+	hypothetical protein VDAG_09574 [Verticillium dahliae VdLs.17]
Vd03G1109	4061252	4063789	-	pre-mRNA-splicing factor ATP-dependent RNA helicase PRP43 [Verticillium dahliae VdLs.17]
Vd03G1114	4076600	4076926	-	allergen Asp f2-like protein [Verticillium dahliae]
Vd03G1127	4118045	4120136	+	Axe2 [Verticillium dahliae VdLs.17]
Vd03G1133	4142138	4142657	-	hypothetical protein VDAG_03583 [Verticillium dahliae VdLs.17]
Vd03G1136	4146379	4147912	-	glucoamylase P [Verticillium dahliae VdLs.17]
Vd03G1137	4148517	4150086	+	60S acidic ribosomal protein P2 [Verticillium dahliae VdLs.17]
Vd03G1160	4223664	4230842	+	none
Vd03G1162	4231120	4233084	-	hypothetical protein VDAG_04805 [Verticillium dahliae VdLs.17]
Vd03G1164	4238419	4240721	-	pectate lyase [Verticillium alfalfae VaMs.102]
Vd03G1178	4285819	4287048	-	hypothetical protein VDAG_07231 [Verticillium dahliae VdLs.17]
Vd03G1188	4309063	4311171	+	FAD binding domain-containing protein [Verticillium dahliae VdLs.17]
Vd03G1195	4334822	4337995	+	PAF acetylhydrolase family protein [Verticillium dahliae VdLs.17]
Vd03G1201	4348921	4350510	+	pectate lyase L [Verticillium dahliae VdLs.17]
Vd03G1218	4400820	4402161	+	yetA [Verticillium dahliae VdLs.17]
Vd04G0007	15947	17664	-	spherulin-1A [Verticillium dahliae VdLs.17]
Vd04G0019	46423	49063	-	hydroxyacid oxidase [Verticillium alfalfae VaMs.102]
Vd04G0020	50601	52346	+	hypothetical protein VDAG_10404 [Verticillium dahliae VdLs.17]
Vd04G0030	109073	110356	+	predicted protein [Verticillium alfalfae VaMs.102]
Vd04G0044	151658	155648	-	subtilisin Carlsberg [Verticillium dahliae VdLs.17]
Vd04G0048	161159	162139	-	riboflavin aldehyde-forming enzyme [Verticillium dahliae VdLs.17]
Vd04G0072	230620	231943	-	predicted protein [Verticillium alfalfae VaMs.102]
Vd04G0076	239210	241201	-	glycosyl hydrolase family 43 protein [Verticillium dahliae VdLs.17]
Vd04G0082	254809	255500	+	hypothetical protein VDAG_08108 [Verticillium dahliae VdLs.17]
Vd04G0092	282566	283372	+	alkaline proteinase [Verticillium dahliae VdLs.17]
Vd04G0093	283574	286233	-	predicted protein [Verticillium alfalfae VaMs.102]
Vd04G0099	301285	304306	-	pectate lyase [Verticillium dahliae VdLs.17]
Vd04G0125	386170	386703	-	hypothetical protein VDAG_03544 [Verticillium dahliae VdLs.17]
Vd04G0139	429031	430640	-	beta-xylosidase [Verticillium dahliae VdLs.17]
Vd04G0149	453875	455062	+	guanidinobutyrase [Verticillium dahliae VdLs.17]
Vd04G0152	460771	461634	-	endo alpha-1,4 polygalactosaminidase precusor [Verticillium dahliae VdLs.17]
Vd04G0153	462276	462905	-	hypothetical protein VDAG_00849 [Verticillium dahliae VdLs.17]
Vd04G0156	475009	477011	+	cellobiose dehydrogenase [Verticillium dahliae VdLs.17]
Vd04G0165	501268	504642	-	disulfide-isomerase A6 [Verticillium dahliae VdLs.17]
Vd04G0172	527280	528870	-	putative glycosyl hydrolase family 81 [Colletotrichum sublineola]
Vd04G0189	572115	573511	+	hypothetical protein VDAG_04553 [Verticillium dahliae VdLs.17]
Vd04G0202	613995	615581	+	oxidoreductase [Verticillium dahliae VdLs.17]
Vd04G0206	619671	621766	+	hypothetical protein VDAG_07374 [Verticillium dahliae VdLs.17]
Vd04G0209	623168	625039	+	saponin hydrolase [Verticillium dahliae VdLs.17]
Vd04G0211	628710	631059	-	hypothetical protein VDAG_04261 [Verticillium dahliae VdLs.17]
Vd04G0217	645578	646449	+	candidapepsin-1 [Verticillium dahliae VdLs.17]
Vd04G0226	665122	665795	+	fibronectin type III domain-containing protein [Verticillium alfalfae VaMs.102]
Vd04G0231	673499	673882	+	hypothetical protein VDAG_10525 [Verticillium dahliae VdLs.17]
Vd04G0243	698143	700131	+	CAS1 protein [Verticillium dahliae VdLs.17]
Vd04G0252	731354	731617	-	hypothetical protein VDAG_04046 [Verticillium dahliae VdLs.17]
Vd04G0255	737041	737716	-	aminopeptidase Y [Verticillium dahliae VdLs.17]
Vd04G0272	778760	779386	+	conserved hypothetical protein [Verticillium alfalfae VaMs.102]
Vd04G0299	856586	857200	+	secreted protein [Verticillium dahliae VdLs.17]
Vd04G0304	866691	867359	+	predicted protein [Verticillium alfalfae VaMs.102]
Vd04G0313	901989	903992	-	glucan 1,3-beta-glucosidase [Verticillium dahliae VdLs.17]
Vd04G0314	904194	908508	+	PAN1 protein [Verticillium dahliae VdLs.17]
Vd04G0317	912792	913646	+	hypothetical protein VDAG_01839 [Verticillium dahliae VdLs.17]
Vd04G0334	967554	969902	+	predicted protein [Verticillium alfalfae VaMs.102]
Vd04G0355	1030991	1032243	+	endoglucanase-5 [Verticillium dahliae VdLs.17]
Vd04G0372	1071862	1072362	-	killer toxin subunits alpha/beta [Verticillium dahliae VdLs.17]
Vd04G0384	1099505	1101447	-	allergen Asp F7 [Colletotrichum higginsianum]
Vd04G0400	1148330	1150486	+	hypothetical protein V502_07073 [Pseudogymnoascus pannorum VKM F-4520 (FW-2644)]
Vd04G0426	1209191	1211638	-	hypothetical protein VDAG_04119 [Verticillium dahliae VdLs.17]
Vd04G0453	1273885	1280591	+	glucan endo-1,3-alpha-glucosidase agn1 [Verticillium dahliae VdLs.17]
Vd04G0461	1314457	1315149	+	dextranase [Verticillium dahliae VdLs.17]
Vd04G0481	1362023	1362403	-	hypothetical protein VDAG_08121 [Verticillium dahliae VdLs.17]
Vd04G0484	1370232	1371021	+	hypothetical protein VDAG_02617 [Verticillium dahliae VdLs.17]
Vd04G0490	1383112	1384161	-	hypothetical protein VDAG_02733 [Verticillium dahliae VdLs.17]
Vd04G0509	1426787	1431464	-	spherulin-1B [Verticillium dahliae VdLs.17]
Vd04G0520	1454119	1456712	+	hypothetical protein VDAG_10471 [Verticillium dahliae VdLs.17]
Vd04G0527	1479414	1482443	+	fungal cellulose binding domain-containing protein [Verticillium dahliae VdLs.17]
Vd04G0533	1494972	1497931	+	glycosyl hydrolase family 43 protein [Verticillium dahliae VdLs.17]
Vd04G0536	1503095	1507007	-	hypothetical protein VDBG_10128 [Verticillium alfalfae VaMs.102]
Vd04G0560	1602593	1603441	-	acetylcholinesterase [Verticillium dahliae VdLs.17]
Vd04G0584	1664123	1664626	-	mannan endo-1,4-beta-mannosidase [Verticillium dahliae VdLs.17]
Vd04G0596	1710581	1712922	-	xylosidase/arabinosidase [Verticillium dahliae VdLs.17]
Vd04G0598	1714474	1716705	-	beta-glucosidase [Verticillium dahliae VdLs.17]
Vd04G0606	1735939	1738718	+	polymerase [Verticillium dahliae VdLs.17]
Vd04G0641	2012821	2014509	-	secreted protein [Verticillium dahliae VdLs.17]
Vd04G0644	2020357	2021473	-	thaumatin family protein [Verticillium dahliae VdLs.17]
Vd04G0687	2148395	2154858	+	pectate lyase C [Verticillium dahliae VdLs.17]
Vd04G0696	2178706	2186108	-	pectate lyase [Verticillium dahliae VdLs.17]
Vd04G0699	2198209	2201487	+	hypothetical protein VDAG_07384 [Verticillium dahliae VdLs.17]
Vd04G0725	2305647	2306252	+	oxidoreductase [Verticillium dahliae VdLs.17]
Vd04G0731	2314746	2315929	-	TPR repeat protein [Verticillium dahliae VdLs.17]
Vd04G0762	2419176	2421196	-	pectin lyase [Verticillium dahliae VdLs.17]
Vd04G0790	2518616	2519270	+	leucyl aminopeptidase [Verticillium dahliae VdLs.17]
Vd04G0805	2560138	2560626	+	SnodProt1 [Verticillium dahliae VdLs.17]
Vd04G0832	2644292	2645052	+	endoglucanase [Verticillium dahliae VdLs.17]
Vd04G0845	2678595	2679772	-	cellulose-binding family II [Verticillium dahliae VdLs.17]
Vd04G0868	2743038	2749604	+	pectate lyase B [Verticillium alfalfae VaMs.102]
Vd04G0900	2899661	2899976	+	hypothetical protein VDAG_06439 [Verticillium dahliae VdLs.17]
Vd04G0916	2946874	2947516	-	hypothetical protein VDAG_05406 [Verticillium dahliae VdLs.17]
Vd04G0943	3038973	3044639	+	predicted protein [Verticillium alfalfae VaMs.102]
Vd04G0967	3100837	3103353	+	hypothetical protein VDAG_02220 [Verticillium dahliae VdLs.17]
Vd04G0978	3133935	3137654	+	acid phosphatase PHO1 [Verticillium dahliae VdLs.17]
Vd04G1024	3270373	3277091	-	para-nitrobenzyl esterase [Verticillium alfalfae VaMs.102]
Vd04G1084	3533713	3535406	-	hypothetical protein VDAG_08583 [Verticillium dahliae VdLs.17]
Vd04G1108	3600068	3601209	-	pectate lyase B [Verticillium alfalfae VaMs.102]
Vd04G1119	3637088	3638263	-	hypothetical protein VDAG_03269 [Verticillium dahliae VdLs.17]
Vd04G1126	3689449	3690814	+	predicted protein [Verticillium alfalfae VaMs.102]
Vd04G1137	3727950	3733762	+	monooxygenase [Verticillium dahliae VdLs.17]
Vd04G1149	3781812	3784339	+	choline dehydrogenase [Verticillium dahliae VdLs.17]
Vd04G1160	3814577	3815623	-	predicted protein [Verticillium alfalfae VaMs.102]
Vd04G1176	3880368	3884355	+	carboxypeptidase cpdS [Verticillium dahliae VdLs.17]
Vd04G1191	3937480	3940135	-	hypothetical protein VDAG_00596 [Verticillium dahliae VdLs.17]
Vd04G1192	3940640	3941037	+	5&apos;/3&apos;-nucleotidase SurE family protein [Verticillium dahliae VdLs.17]
Vd04G1208	3978668	3980944	+	hypothetical protein VDAG_00055 [Verticillium dahliae VdLs.17]
Vd04G1214	3994429	3995413	-	mannan endo-1,4-beta-mannosidase [Verticillium alfalfae VaMs.102]
Vd04G1218	4004539	4007875	-	aspartic proteinase [Verticillium dahliae VdLs.17]
Vd04G1219	4008895	4012864	-	hypothetical protein VDAG_02501 [Verticillium dahliae VdLs.17]
Vd04G1220	4016363	4017026	+	hypothetical protein FOVG_11213 [Fusarium oxysporum f. sp. pisi HDV247]
Vd04G1234	4071872	4075696	+	glycerophosphoryl diester phosphodiesterase [Colletotrichum fioriniae PJ7]
Vd04G1238	4083119	4087022	+	endoglucanase B [Verticillium dahliae VdLs.17]
Vd05G0003	6990	8462	-	hypothetical protein VDAG_08681 [Verticillium dahliae VdLs.17]
Vd05G0006	12652	14298	-	hypothetical protein VDAG_07295 [Verticillium dahliae VdLs.17]
Vd05G0012	25479	26579	-	hypothetical protein VDAG_02731 [Verticillium dahliae VdLs.17]
Vd05G0022	55432	56097	-	PRY1 protein [Verticillium dahliae VdLs.17]
Vd05G0029	74213	75173	+	zinc carboxypeptidase A [Verticillium dahliae VdLs.17]
Vd05G0031	77466	82508	+	hypothetical protein VDAG_09587 [Verticillium dahliae VdLs.17]
Vd05G0034	89438	92304	-	guanyl-specific ribonuclease F1 [Verticillium dahliae VdLs.17]
Vd05G0062	203915	204961	+	hypothetical protein VDAG_09380 [Verticillium dahliae VdLs.17]
Vd05G0069	223055	224100	-	hypothetical protein VDAG_01905 [Verticillium dahliae VdLs.17]
Vd05G0074	250868	255443	-	cellulose-growth-specific protein [Verticillium dahliae VdLs.17]
Vd05G0079	293381	294643	+	beta-lactamase family protein [Verticillium dahliae VdLs.17]
Vd05G0089	321049	321852	+	hypothetical protein VDAG_07137 [Verticillium dahliae VdLs.17]
Vd05G0102	371073	373726	+	hypothetical protein VDAG_04755 [Verticillium dahliae VdLs.17]
Vd05G0108	395369	405687	-	cholinesterase [Verticillium dahliae VdLs.17]
Vd05G0118	427131	428214	+	hypothetical protein VDAG_00177 [Verticillium dahliae VdLs.17]
Vd05G0122	437165	441955	+	wsc domain-containing protein [Colletotrichum orbiculare MAFF 240422]
Vd05G0134	476406	477276	-	predicted protein [Verticillium alfalfae VaMs.102]
Vd05G0177	739397	741275	-	hypothetical protein VDAG_00769 [Verticillium dahliae VdLs.17]
Vd05G0230	907798	908199	-	hypothetical protein VDAG_08104 [Verticillium dahliae VdLs.17]
Vd05G0247	958262	959451	+	hypothetical protein VDAG_08416 [Verticillium dahliae VdLs.17]
Vd05G0259	999997	1000431	-	acid phosphatase, putative [Colletotrichum gloeosporioides Nara gc5]
Vd05G0268	1026855	1027686	+	hypothetical protein VDAG_05640 [Verticillium dahliae VdLs.17]
Vd05G0279	1050182	1051401	-	hypothetical protein VDAG_08956 [Verticillium dahliae VdLs.17]
Vd05G0281	1055933	1057907	-	pectate lyase B [Verticillium dahliae VdLs.17]
Vd05G0313	1144763	1146288	-	YkgB [Verticillium dahliae VdLs.17]
Vd05G0366	1350297	1352787	+	conserved hypothetical protein [Verticillium alfalfae VaMs.102]
Vd05G0381	1395853	1396534	+	hypothetical protein VDAG_07937 [Verticillium dahliae VdLs.17]
Vd05G0382	1397273	1399064	-	hypothetical protein VDAG_02835 [Verticillium dahliae VdLs.17]
Vd05G0385	1403459	1403748	+	galactose oxidase [Verticillium dahliae VdLs.17]
Vd05G0397	1439175	1439447	-	hypothetical protein VDAG_03488 [Verticillium dahliae VdLs.17]
Vd05G0398	1439685	1440475	-	beta-glucosidase [Verticillium dahliae VdLs.17]
Vd05G0399	1441899	1445835	-	hypothetical protein VDAG_04440 [Verticillium dahliae VdLs.17]
Vd05G0401	1446117	1449482	+	hypothetical protein VDAG_00845 [Verticillium dahliae VdLs.17]
Vd05G0416	1495221	1496067	+	disulfide-isomerase [Verticillium dahliae VdLs.17]
Vd05G0425	1521399	1528884	+	hypothetical protein VDAG_04083 [Verticillium dahliae VdLs.17]
Vd05G0486	1699967	1701157	-	none
Vd05G0500	1744220	1746536	+	hypothetical protein VDAG_02273 [Verticillium dahliae VdLs.17]
Vd05G0501	1770343	1771937	+	NADP:D-xylose dehydrogenase [Verticillium dahliae VdLs.17]
Vd05G0509	1797855	1798883	-	feruloyl esterase B [Verticillium dahliae VdLs.17]
Vd05G0523	1829563	1831438	+	cell wall glycosyl hydrolase YteR [Verticillium dahliae VdLs.17]
Vd05G0527	1842065	1846241	-	gamma-glutamyltranspeptidase [Verticillium dahliae VdLs.17]
Vd05G0529	1848962	1850490	-	hypothetical protein VDBG_08821 [Verticillium alfalfae VaMs.102]
Vd05G0558	1948121	1957298	-	hypothetical protein VDAG_03322 [Verticillium dahliae VdLs.17]
Vd05G0559	1956247	1956895	+	FAD binding domain-containing protein [Verticillium dahliae VdLs.17]
Vd05G0568	1978009	1978848	+	choline dehydrogenase [Verticillium dahliae VdLs.17]
Vd05G0569	1979319	1981679	-	hypothetical protein VDAG_06144 [Verticillium dahliae VdLs.17]
Vd05G0576	2004885	2006373	+	hypothetical protein VDAG_06718 [Verticillium dahliae VdLs.17]
Vd05G0625	2173552	2174741	-	minor extracellular protease vpr [Verticillium dahliae VdLs.17]
Vd05G0632	2187660	2189027	-	carboxypeptidase Y inhibitor [Verticillium dahliae VdLs.17]
Vd05G0635	2196097	2198888	-	allergen rAsp f9-like protein [Verticillium dahliae]
Vd05G0645	2230318	2232544	+	mannan endo-1,6-alpha-mannosidase DCW1 [Verticillium dahliae VdLs.17]
Vd05G0669	2304777	2310576	+	choline dehydrogenase [Verticillium alfalfae VaMs.102]
Vd05G0675	2339413	2346246	-	hypothetical protein VDAG_06554 [Verticillium dahliae VdLs.17]
Vd05G0681	2368075	2370321	+	beta-galactosidase [Verticillium dahliae VdLs.17]
Vd05G0702	2447886	2448461	+	cellulose-growth-specific protein [Verticillium dahliae VdLs.17]
Vd05G0718	2493789	2497026	+	conserved hypothetical protein [Verticillium alfalfae VaMs.102]
Vd05G0723	2509777	2510936	+	exoglucanase [Verticillium dahliae VdLs.17]
Vd05G0739	2584866	2585583	+	conserved hypothetical protein [Verticillium alfalfae VaMs.102]
Vd05G0751	2655829	2656833	+	predicted protein [Verticillium alfalfae VaMs.102]
Vd05G0767	2693809	2695069	+	hypothetical protein VDBG_10133 [Verticillium alfalfae VaMs.102]
Vd05G0790	2801358	2803216	-	UDP-glucose:glycoprotein glucosyltransferase [Verticillium alfalfae VaMs.102]
Vd05G0791	2803928	2804465	-	hypothetical protein VDAG_04102 [Verticillium dahliae VdLs.17]
Vd05G0801	2831541	2834261	-	hypothetical protein VDAG_08153 [Verticillium dahliae VdLs.17]
Vd05G0811	2857684	2859112	-	hypothetical protein VDAG_03349 [Verticillium dahliae VdLs.17]
Vd05G0824	2928329	2931054	+	hypothetical protein VDAG_10293 [Verticillium dahliae VdLs.17]
Vd05G0839	2997269	2998168	+	hypothetical protein S40285_03305 [Stachybotrys chlorohalonata IBT 40285]
Vd05G0849	3028213	3029206	+	alpha-N-arabinofuranosidase A [Verticillium dahliae VdLs.17]
Vd05G0889	3139554	3141098	-	endoglucanase-4 [Verticillium dahliae VdLs.17]
Vd05G0907	3183575	3184624	+	FK506-binding protein [Verticillium dahliae VdLs.17]
Vd05G0932	3265581	3267847	+	xylosidase/arabinosidase [Verticillium dahliae VdLs.17]
Vd05G0937	3285726	3287576	+	carboxypeptidase S1 [Verticillium dahliae VdLs.17]
Vd05G0949	3323159	3325796	-	pectin lyase [Verticillium dahliae VdLs.17]
Vd05G0977	3404435	3405505	-	hypothetical protein VDAG_05722 [Verticillium dahliae VdLs.17]
Vd05G0980	3414221	3417945	-	hypothetical protein VDAG_10378 [Verticillium dahliae VdLs.17]
Vd05G0984	3426014	3427000	+	hypothetical protein VDAG_08070 [Verticillium dahliae VdLs.17]
Vd05G0991	3458658	3460339	+	hypothetical protein VDAG_00817 [Verticillium dahliae VdLs.17]
Vd05G1004	3506286	3507556	+	hypothetical protein VDAG_00076 [Verticillium dahliae VdLs.17]
Vd05G1007	3512416	3514533	-	choline dehydrogenase [Verticillium dahliae VdLs.17]
Vd05G1018	3555317	3560620	-	hypothetical protein VDAG_02827 [Verticillium dahliae VdLs.17]
Vd05G1023	3574503	3576015	-	hypothetical protein VDAG_01870 [Verticillium dahliae VdLs.17]
Vd05G1030	3589923	3591089	+	hypothetical protein VDAG_02130 [Verticillium dahliae VdLs.17]
Vd05G1034	3601517	3603040	+	ribonuclease Trv [Verticillium alfalfae VaMs.102]
Vd05G1037	3610433	3612811	-	pectate lyase B [Verticillium dahliae VdLs.17]
Vd05G1048	3645289	3648448	-	hypothetical protein VDAG_09886 [Verticillium dahliae VdLs.17]
Vd05G1049	3652601	3654674	+	conserved hypothetical protein [Verticillium alfalfae VaMs.102]
Vd05G1064	3700437	3705317	+	hypothetical protein VDAG_02816 [Verticillium dahliae VdLs.17]
Vd05G1072	3723328	3724470	-	endopolygalacturonase [Verticillium dahliae VdLs.17]
Vd06G0015	28541	30879	+	metalloproteinase [Verticillium dahliae VdLs.17]
Vd06G0039	137644	139465	-	hypothetical protein VDAG_10367 [Verticillium dahliae VdLs.17]
Vd06G0068	249189	252006	-	alcohol dehydrogenase [Verticillium dahliae VdLs.17]
Vd06G0079	292211	292513	+	hypothetical protein VDAG_06979 [Verticillium dahliae VdLs.17]
Vd06G0096	326197	327142	+	hypothetical protein VDAG_05035 [Verticillium dahliae VdLs.17]
Vd06G0110	364420	368163	-	hypothetical protein VDAG_06799 [Verticillium dahliae VdLs.17]
Vd06G0133	468863	469771	+	hypothetical protein VDAG_05039 [Verticillium dahliae VdLs.17]
Vd06G0140	483825	484534	+	pectate lyase [Verticillium dahliae VdLs.17]
Vd06G0145	491972	493101	+	rhamnogalacturonan acetylesterase [Verticillium dahliae VdLs.17]
Vd06G0152	510540	511676	-	hypothetical protein VDAG_08653 [Verticillium dahliae VdLs.17]
Vd06G0161	537355	537857	-	choline dehydrogenase [Verticillium dahliae VdLs.17]
Vd06G0164	542225	545089	-	ecm33 [Verticillium dahliae VdLs.17]
Vd06G0176	579902	581875	+	necrosis and ethylene inducing peptide [Verticillium dahliae]
Vd06G0190	620505	621479	+	hypothetical protein VDAG_09275 [Verticillium dahliae VdLs.17]
Vd06G0198	640435	641757	-	chitosanase [Verticillium alfalfae VaMs.102]
Vd06G0212	679789	684095	+	hypothetical protein VDAG_01759 [Verticillium dahliae VdLs.17]
Vd06G0214	685496	696517	+	hypothetical protein VDAG_03508 [Verticillium dahliae VdLs.17]
Vd06G0223	720539	721078	-	glycoprotein X [Colletotrichum graminicola M1.001]
Vd06G0247	777447	779085	-	conserved hypothetical protein [Verticillium alfalfae VaMs.102]
Vd06G0289	898294	901932	+	dipeptidyl aminopeptidase B [Verticillium dahliae VdLs.17]
Vd06G0300	934354	937584	+	ribonuclease [Colletotrichum higginsianum]
Vd06G0336	1076526	1077314	-	hypothetical protein VDAG_03201 [Verticillium dahliae VdLs.17]
Vd06G0343	1091006	1097222	-	beta-galactosidase [Verticillium dahliae VdLs.17]
Vd06G0346	1104655	1106746	+	PRY1 protein [Verticillium dahliae VdLs.17]
Vd06G0356	1134402	1137218	-	phosphatidylglycerol/phosphatidylinositol transfer protein [Verticillium dahliae VdLs.17]
Vd06G0371	1179296	1180714	-	pectate lyase [Verticillium dahliae VdLs.17]
Vd06G0375	1188937	1189952	-	aminopeptidase Y [Verticillium dahliae VdLs.17]
Vd06G0377	1192816	1198427	-	bacilysin biosynthesis oxidoreductase bacC [Verticillium dahliae VdLs.17]
Vd06G0381	1210727	1212926	-	hypothetical protein VDAG_02586 [Verticillium dahliae VdLs.17]
Vd06G0397	1258193	1259527	-	secreted protein [Verticillium dahliae VdLs.17]
Vd06G0400	1265088	1265920	+	hypothetical protein VDAG_02042 [Verticillium dahliae VdLs.17]
Vd06G0404	1277820	1281052	-	periplasmic beta-glucosidase/beta-xylosidase [Verticillium dahliae VdLs.17]
Vd06G0410	1298164	1302218	-	keratin-associated protein 5-4 [Verticillium alfalfae VaMs.102]
Vd06G0416	1320953	1321811	-	predicted protein [Verticillium alfalfae VaMs.102]
Vd06G0424	1350600	1359197	-	conserved hypothetical protein [Verticillium alfalfae VaMs.102]
Vd06G0438	1405371	1406921	-	hypothetical protein VDAG_01003 [Verticillium dahliae VdLs.17]
Vd06G0444	1427856	1429829	-	hypothetical protein VDAG_03637 [Verticillium dahliae VdLs.17]
Vd06G0449	1465392	1468853	+	mannan endo-1,4-beta-mannosidase [Verticillium dahliae VdLs.17]
Vd06G0450	1470250	1473305	+	hypothetical protein VDAG_01213 [Verticillium dahliae VdLs.17]
Vd06G0453	1478848	1482964	-	hypothetical protein VDAG_00904 [Verticillium dahliae VdLs.17]
Vd06G0457	1493541	1494124	-	hypothetical protein VDAG_00726 [Verticillium dahliae VdLs.17]
Vd06G0490	1611458	1611853	+	hypothetical protein VDAG_09881 [Verticillium dahliae VdLs.17]
Vd06G0492	1613751	1615525	-	hypothetical protein S40285_09444 [Stachybotrys chlorohalonata IBT 40285]
Vd06G0499	1633556	1634129	-	lysophospholipase [Verticillium dahliae VdLs.17]
Vd06G0515	1668012	1671829	-	acetylcholinesterase [Verticillium dahliae VdLs.17]
Vd06G0521	1687562	1689603	+	conserved hypothetical protein [Verticillium alfalfae VaMs.102]
Vd06G0540	1760598	1762357	+	hypothetical protein VDAG_02302 [Verticillium dahliae VdLs.17]
Vd06G0542	1766535	1767294	+	hypothetical protein VDAG_07604 [Verticillium dahliae VdLs.17]
Vd06G0549	1787492	1790930	+	alpha-galactosidase [Verticillium dahliae VdLs.17]
Vd06G0577	1874991	1875789	+	exopolygalacturonase [Verticillium dahliae VdLs.17]
Vd06G0603	1950086	1951407	-	hypothetical protein VDAG_04423 [Verticillium dahliae VdLs.17]
Vd06G0604	1952750	1957142	+	hypothetical protein VDAG_05560 [Verticillium dahliae VdLs.17]
Vd06G0607	1961820	1962687	-	hypothetical protein VDAG_06146 [Verticillium dahliae VdLs.17]
Vd06G0611	1971292	1974638	+	hypothetical protein S7711_06206 [Stachybotrys chartarum IBT 7711]
Vd06G0615	1980085	1982135	-	hypothetical protein VDAG_10490 [Verticillium dahliae VdLs.17]
Vd06G0626	2010450	2015996	-	hypothetical protein VDAG_00274 [Verticillium dahliae VdLs.17]
Vd06G0630	2021419	2025833	-	glucan 1,3-beta-glucosidase [Verticillium dahliae VdLs.17]
Vd06G0652	2075009	2077068	+	hypothetical protein VDAG_00087 [Verticillium dahliae VdLs.17]
Vd06G0659	2096642	2097403	-	glucan 1,3-beta-glucosidase [Verticillium dahliae VdLs.17]
Vd06G0660	2098307	2100280	+	hypothetical protein NECHADRAFT_106153 [Nectria haematococca mpVI 77-13-4]
Vd06G0698	2229762	2233190	+	predicted protein [Verticillium alfalfae VaMs.102]
Vd06G0718	2328568	2331112	+	hypothetical protein VDAG_04030 [Verticillium dahliae VdLs.17]
Vd06G0720	2338106	2342315	-	hypothetical protein VDAG_10063 [Verticillium dahliae VdLs.17]
Vd06G0723	2343873	2349159	-	oxidoreductase [Verticillium dahliae VdLs.17]
Vd06G0725	2352465	2354174	+	hypothetical protein VDAG_03110 [Verticillium dahliae VdLs.17]
Vd06G0740	2402892	2405069	+	predicted protein [Verticillium alfalfae VaMs.102]
Vd06G0743	2409932	2411127	+	cerevisin [Verticillium dahliae VdLs.17]
Vd06G0750	2426735	2429728	-	1,3-beta-glucanosyltransferase gel1 [Verticillium dahliae VdLs.17]
Vd06G0753	2435329	2438388	+	hypothetical protein VDAG_07851 [Verticillium dahliae VdLs.17]
Vd06G0756	2444371	2446290	-	neutral alpha-glucosidase AB [Verticillium dahliae VdLs.17]
Vd06G0778	2499219	2502123	-	phosphoglycerate mutase family protein [Verticillium dahliae VdLs.17]
Vd06G0780	2504924	2506891	+	chitinase [Verticillium dahliae VdLs.17]
Vd06G0785	2688194	2689494	-	alcohol dehydrogenase [Verticillium alfalfae VaMs.102]
Vd06G0829	2827917	2830989	-	hypothetical protein VDAG_04624 [Verticillium dahliae VdLs.17]
Vd06G0867	2951728	2952135	+	pectate lyase [Verticillium dahliae VdLs.17]
Vd06G0884	2999592	3005729	+	endoglucanase-4 [Verticillium dahliae VdLs.17]
Vd06G0913	3116290	3117566	-	hypothetical protein VDAG_07148 [Verticillium dahliae VdLs.17]
Vd06G0921	3136502	3137930	-	rare lipoprotein A [Verticillium alfalfae VaMs.102]
Vd06G0927	3156684	3158235	-	hypothetical protein VDAG_05983 [Verticillium dahliae VdLs.17]
Vd06G0941	3190919	3193325	+	acetylxylan esterase [Verticillium dahliae VdLs.17]
Vd06G0971	3287732	3288020	+	chitinase [Verticillium dahliae VdLs.17]
Vd06G0988	3369845	3377349	-	cell wall glycosyl hydrolase [Colletotrichum orbiculare MAFF 240422]
Vd06G0995	3400934	3403270	-	rhamnogalacturonan acetylesterase [Verticillium dahliae VdLs.17]
Vd06G1006	3426000	3426906	+	para-nitrobenzyl esterase [Verticillium dahliae VdLs.17]
Vd06G1043	3527802	3528865	+	hypothetical protein VDAG_08354 [Verticillium dahliae VdLs.17]
Vd06G1046	3535279	3536668	+	hypothetical protein VDAG_05710 [Verticillium dahliae VdLs.17]
Vd06G1058	3566452	3568173	+	glucoamylase [Verticillium dahliae VdLs.17]
Vd06G1063	3579705	3580872	+	hypothetical protein VDAG_09846 [Verticillium dahliae VdLs.17]
Vd06G1066	3591710	3593680	-	hypothetical protein VDAG_05483 [Verticillium dahliae VdLs.17]
Vd06G1073	3611922	3613399	+	D-amino-acid oxidase [Verticillium dahliae VdLs.17]
Vd06G1079	3649145	3650401	+	hypothetical protein VDAG_03221 [Verticillium dahliae VdLs.17]
Vd06G1081	3652338	3653663	+	hypothetical protein VDAG_04434 [Verticillium dahliae VdLs.17]
Vd07G0007	13613	16234	-	hypothetical protein VDAG_05305 [Verticillium dahliae VdLs.17]
Vd07G0016	36965	39108	-	hypothetical protein VDAG_10456 [Verticillium dahliae VdLs.17]
Vd07G0038	103133	103778	-	6-phosphogluconolactonase [Verticillium dahliae VdLs.17]
Vd07G0040	116126	116416	+	hypothetical protein VDAG_05096 [Verticillium dahliae VdLs.17]
Vd07G0059	184663	185782	-	endoglucanase [Verticillium dahliae VdLs.17]
Vd07G0068	205540	207033	-	cerato-ulmin [Verticillium dahliae VdLs.17]
Vd07G0071	209964	213769	+	hypothetical protein VDAG_04395 [Verticillium dahliae VdLs.17]
Vd07G0077	233379	234782	+	hypothetical protein VDAG_02788 [Verticillium dahliae VdLs.17]
Vd07G0085	254891	257392	+	alpha-L-rhamnosidase [Verticillium dahliae VdLs.17]
Vd07G0092	276938	278567	+	dienelactone hydrolase family protein [Verticillium dahliae VdLs.17]
Vd07G0120	360883	365817	+	hypothetical protein VDAG_05682 [Verticillium dahliae VdLs.17]
Vd07G0127	382738	383792	+	secreted lyase [Verticillium alfalfae VaMs.102]
Vd07G0138	409327	410563	+	ABC transporter [Verticillium dahliae VdLs.17]
Vd07G0154	453014	453460	+	leucyl aminopeptidase [Verticillium dahliae VdLs.17]
Vd07G0161	473724	478902	+	hypothetical protein VDAG_01357 [Verticillium dahliae VdLs.17]
Vd07G0172	521275	523573	-	hypothetical protein VDAG_03991 [Verticillium dahliae VdLs.17]
Vd07G0211	642015	643004	-	isoamyl alcohol oxidase [Verticillium dahliae VdLs.17]
Vd07G0222	697962	701688	+	hypothetical protein VDAG_03513 [Verticillium dahliae VdLs.17]
Vd07G0223	701945	704907	+	endoglucanase II [Verticillium dahliae VdLs.17]
Vd07G0230	744523	744957	+	WSC domain-containing protein [Verticillium dahliae VdLs.17]
Vd07G0236	759388	760643	-	beta-hexosaminidase beta chain [Verticillium dahliae VdLs.17]
Vd07G0285	892326	893346	-	aminobenzoyl-glutamate utilization protein B [Verticillium dahliae VdLs.17]
Vd07G0311	954420	958813	-	beta-glucosidase [Verticillium dahliae VdLs.17]
Vd07G0314	961590	963092	+	pectate lyase [Verticillium alfalfae VaMs.102]
Vd07G0320	1003900	1010257	-	hypothetical protein VDAG_08944 [Verticillium dahliae VdLs.17]
Vd07G0324	1018890	1019831	-	hypothetical protein VDAG_06954 [Verticillium dahliae VdLs.17]
Vd07G0341	1131479	1132678	-	hemerythrin HHE cation binding domain-containing protein [Verticillium dahliae VdLs.17]
Vd07G0349	1157924	1159330	+	hypothetical protein VDAG_08152 [Verticillium dahliae VdLs.17]
Vd07G0352	1164364	1167565	+	serin endopeptidase [Verticillium dahliae VdLs.17]
Vd07G0361	1204689	1205036	+	cytoplasm protein [Verticillium dahliae VdLs.17]
Vd07G0378	1246442	1247809	-	hypothetical protein VDAG_08284 [Verticillium dahliae VdLs.17]
Vd07G0383	1289443	1290015	-	hypothetical protein VDAG_03886 [Verticillium dahliae VdLs.17]
Vd07G0405	1355992	1361458	+	endo-1,4-beta-xylanase [Verticillium dahliae VdLs.17]
Vd07G0410	1369680	1373518	+	hypothetical protein VDAG_09799 [Verticillium dahliae VdLs.17]
Vd07G0417	1536150	1541944	-	hypothetical protein VDAG_02034 [Verticillium dahliae VdLs.17]
Vd07G0421	1550336	1553304	-	hypothetical protein VDAG_06125 [Verticillium dahliae VdLs.17]
Vd07G0428	1567936	1569660	-	hypothetical protein VDAG_06999 [Verticillium dahliae VdLs.17]
Vd07G0434	1581653	1583464	-	endo-1,4-beta-xylanase [Verticillium dahliae VdLs.17]
Vd07G0451	1623296	1624087	+	conserved hypothetical protein [Verticillium alfalfae VaMs.102]
Vd07G0462	1653008	1653906	+	aminopeptidase [Verticillium dahliae VdLs.17]
Vd07G0464	1660314	1667102	-	predicted protein [Verticillium alfalfae VaMs.102]
Vd07G0484	1718724	1719866	+	hypothetical protein VDAG_09229 [Verticillium dahliae VdLs.17]
Vd07G0499	1758701	1760824	+	L-amino-acid oxidase [Verticillium dahliae VdLs.17]
Vd07G0510	1785366	1792914	+	hypothetical protein VDAG_06425 [Verticillium dahliae VdLs.17]
Vd07G0536	1884935	1885993	-	exo-polygalacturonase [Verticillium dahliae VdLs.17]
Vd07G0537	1887339	1888427	-	ECM14 protein [Verticillium dahliae VdLs.17]
Vd07G0555	1932422	1938000	+	Cel74a [Verticillium dahliae VdLs.17]
Vd07G0560	1955272	1959009	+	Axe2 [Verticillium dahliae VdLs.17]
Vd07G0568	1994313	1994948	-	hypothetical protein VDAG_00164 [Verticillium dahliae VdLs.17]
Vd07G0570	1997105	1997659	-	cutinase [Verticillium dahliae VdLs.17]
Vd07G0633	2220230	2222483	+	septation protein SUN4 [Verticillium dahliae VdLs.17]
Vd07G0634	2222812	2230925	-	hypothetical protein VDAG_03369 [Verticillium dahliae VdLs.17]
Vd07G0651	2276286	2278367	-	conserved hypothetical protein [Verticillium alfalfae VaMs.102]
Vd07G0666	2320692	2322408	+	exoglucanase-6A [Verticillium dahliae VdLs.17]
Vd07G0672	2338485	2340154	-	hypothetical protein VDAG_02746 [Verticillium dahliae VdLs.17]
Vd07G0713	2467058	2467513	+	hypothetical protein VDAG_07143 [Verticillium dahliae VdLs.17]
Vd07G0731	2549880	2550222	+	endoglucanase-4 [Verticillium dahliae VdLs.17]
Vd07G0750	2595258	2597039	-	4-carboxymuconolactone decarboxylase family protein [Verticillium dahliae VdLs.17]
Vd07G0753	2601781	2603311	+	hypothetical protein VDAG_00945 [Verticillium dahliae VdLs.17]
Vd07G0754	2603590	2604741	-	hypothetical protein VDAG_02734 [Verticillium dahliae VdLs.17]
Vd07G0759	2613498	2615414	+	DNL zinc finger domain-containing protein [Verticillium dahliae VdLs.17]
Vd07G0782	2703033	2704901	+	glycogen debranching enzyme [Verticillium dahliae VdLs.17]
Vd07G0783	2706274	2707794	+	ligninase H2 [Verticillium dahliae VdLs.17]
Vd07G0786	2712457	2717117	-	carboxypeptidase [Verticillium alfalfae VaMs.102]
Vd07G0788	2719855	2722245	-	hypothetical protein VDAG_05119 [Verticillium dahliae VdLs.17]
Vd07G0801	2766446	2767389	-	galactan 1,3-beta-galactosidase [Verticillium dahliae VdLs.17]
Vd07G0812	2801307	2802278	-	mannan endo-1,4-beta-mannosidase [Verticillium dahliae VdLs.17]
Vd07G0815	2808232	2809730	+	hypothetical protein VDAG_08639 [Verticillium dahliae VdLs.17]
Vd07G0823	2831092	2831793	+	carboxypeptidase [Verticillium dahliae VdLs.17]
Vd07G0828	2841809	2842465	-	hypothetical protein VDAG_07115 [Verticillium dahliae VdLs.17]
Vd07G0848	2933224	2934654	-	conserved hypothetical protein [Verticillium alfalfae VaMs.102]
Vd07G0854	2946116	2946786	+	endoglucanase A [Verticillium dahliae VdLs.17]
Vd07G0855	2947083	2948372	-	secreted protein [Verticillium dahliae VdLs.17]
Vd07G0862	2966995	2968995	+	hypothetical protein VDAG_05027 [Verticillium dahliae VdLs.17]
Vd07G0869	2984290	2985048	+	hypothetical protein VDAG_06236 [Verticillium dahliae VdLs.17]
Vd07G0886	3033204	3033513	-	LysM domain-containing protein [Verticillium dahliae VdLs.17]
Vd07G0890	3038736	3039482	+	cutinase [Verticillium dahliae VdLs.17]
Vd07G0895	3047341	3049162	+	conserved hypothetical protein [Verticillium alfalfae VaMs.102]
Vd07G0899	3067501	3069870	+	tannase [Verticillium dahliae VdLs.17]
Vd07G0900	3070952	3072561	+	glucose oxidase [Verticillium alfalfae VaMs.102]
Vd07G0903	3076131	3077673	-	alpha/beta hydrolase [Verticillium dahliae VdLs.17]
Vd07G0905	3081116	3084696	+	hypothetical protein VDAG_05121 [Verticillium dahliae VdLs.17]
Vd07G0909	3098968	3100186	+	neuraminidase [Verticillium alfalfae VaMs.102]
Vd07G0930	3158481	3159366	-	hypothetical protein VDAG_07875 [Verticillium dahliae VdLs.17]
Vd07G0948	3204794	3205204	+	conserved hypothetical protein [Verticillium alfalfae VaMs.102]
Vd07G0957	3235660	3240217	+	necrosis- and ethylene-inducing protein-inducing protein [Verticillium alfalfae VaMs.102]
Vd07G0962	3253476	3253820	+	amine oxidase [Verticillium dahliae VdLs.17]
Vd07G0967	3263341	3263907	+	hypothetical protein VDAG_01048 [Verticillium dahliae VdLs.17]
Vd07G0968	3264208	3265970	+	26S protease regulatory subunit 4 [Verticillium alfalfae VaMs.102]
Vd07G0983	3306033	3307661	-	extracellular elastinolytic metalloproteinase [Verticillium alfalfae VaMs.102]
Vd07G0985	3311753	3316550	-	hypothetical protein VDAG_02705 [Verticillium dahliae VdLs.17]
Vd08G0022	67668	68318	-	25 kDa protein elicitor [Verticillium dahliae VdLs.17]
Vd08G0030	84980	85719	+	secretory phospholipase A2 [Verticillium dahliae VdLs.17]
Vd08G0032	91366	95295	+	hypothetical protein VDAG_05970 [Verticillium dahliae VdLs.17]
Vd08G0037	104936	107758	+	isoamyl alcohol oxidase [Verticillium dahliae VdLs.17]
Vd08G0062	169416	171109	-	carboxypeptidase B [Verticillium dahliae VdLs.17]
Vd08G0128	351263	352307	+	hypothetical protein VDAG_05961 [Verticillium dahliae VdLs.17]
Vd08G0144	389392	393726	-	alpha-L-rhamnosidase [Verticillium dahliae VdLs.17]
Vd08G0150	403467	406290	-	conserved hypothetical protein [Verticillium alfalfae VaMs.102]
Vd08G0166	480744	482023	+	secretory phospholipase A2 [Verticillium dahliae VdLs.17]
Vd08G0174	503713	504060	-	serine/threonine-protein kinase/endoribonuclease IRE1 [Verticillium dahliae VdLs.17]
Vd08G0198	577261	584373	+	beta-glucosidase [Verticillium dahliae VdLs.17]
Vd08G0213	633986	634588	-	aspergillopepsin F [Verticillium dahliae VdLs.17]
Vd08G0217	662618	666123	-	FAD binding domain-containing protein [Verticillium dahliae VdLs.17]
Vd08G0223	687487	692462	+	mannosyl-oligosaccharide glucosidase [Verticillium dahliae VdLs.17]
Vd08G0249	774706	776990	+	MGS207 protein [Verticillium dahliae VdLs.17]
Vd08G0257	797051	797401	-	hypothetical protein UV8b_1396 [Ustilaginoidea virens]
Vd08G0264	819104	820222	+	feruloyl esterase B [Verticillium alfalfae VaMs.102]
Vd08G0276	856676	859282	-	lipase [Verticillium dahliae VdLs.17]
Vd08G0288	881718	882639	+	FAD binding domain-containing protein [Verticillium dahliae VdLs.17]
Vd08G0289	883326	885327	+	pregnancy-associated glycoprotein [Verticillium dahliae VdLs.17]
Vd08G0303	920873	923151	-	hypothetical protein VDAG_09073 [Verticillium dahliae VdLs.17]
Vd08G0318	966803	971292	+	hypothetical protein VDAG_06990 [Verticillium dahliae VdLs.17]
Vd08G0319	972393	974319	+	none
Vd08G0326	1006510	1007280	+	secreted protein [Verticillium alfalfae VaMs.102]
Vd08G0341	1048355	1049293	+	exoglucanase [Verticillium dahliae VdLs.17]
Vd08G0344	1055948	1058102	+	polysaccharide deacetylase family protein [Verticillium dahliae VdLs.17]
Vd08G0371	1138190	1140034	+	endo-1,4-beta-xylanase [Verticillium dahliae VdLs.17]
Vd08G0378	1152218	1156761	-	glyoxalase/bleomycin resistance protein/dioxygenase [Verticillium dahliae VdLs.17]
Vd08G0388	1187431	1187697	-	hypothetical protein VDAG_07371 [Verticillium dahliae VdLs.17]
Vd08G0391	1201579	1205862	-	mono [Verticillium dahliae VdLs.17]
Vd08G0392	1202465	1203862	+	3-phytase [Verticillium dahliae VdLs.17]
Vd08G0400	1224230	1227856	+	6-hydroxy-D-nicotine oxidase [Verticillium dahliae VdLs.17]
Vd08G0401	1229070	1230938	+	hypothetical protein VDAG_04597 [Verticillium dahliae VdLs.17]
Vd08G0409	1257153	1258185	+	acetyl esterase [Verticillium dahliae VdLs.17]
Vd08G0412	1267538	1268750	+	hypothetical protein VDAG_03375 [Verticillium dahliae VdLs.17]
Vd08G0424	1305011	1310393	+	BNR/Asp-box repeat domain-containing protein [Verticillium dahliae VdLs.17]
Vd08G0446	1393553	1395704	-	polygalacturonase [Verticillium dahliae VdLs.17]
Vd08G0473	1494352	1496629	-	hypothetical protein VDBG_10133 [Verticillium alfalfae VaMs.102]
Vd08G0482	1514682	1515236	-	hypothetical protein VDAG_04643 [Verticillium dahliae VdLs.17]
Vd08G0507	1591657	1593645	-	endo-1,3(4)-beta-glucanase [Verticillium dahliae VdLs.17]
Vd08G0517	1620283	1620815	-	hypothetical protein VDAG_10511 [Verticillium dahliae VdLs.17]
Vd08G0551	1745555	1745814	-	FG-GAP repeat domain-containing protein [Verticillium dahliae VdLs.17]
Vd08G0561	1780426	1780620	-	hypothetical protein VDAG_03758 [Verticillium dahliae VdLs.17]
Vd08G0565	1790410	1794699	-	secreted protein [Verticillium dahliae VdLs.17]
Vd08G0587	1851419	1854950	+	IDI-3 protein [Verticillium dahliae VdLs.17]
Vd08G0591	1860304	1861334	-	hypothetical protein VDAG_05587 [Verticillium dahliae VdLs.17]
Vd08G0601	1888677	1889771	-	exopolygalacturonase [Verticillium dahliae VdLs.17]
Vd08G0609	1907423	1907936	+	alpha-galactosidase [Verticillium dahliae VdLs.17]
Vd08G0632	2117448	2118538	-	inorganic pyrophosphatase [Verticillium alfalfae VaMs.102]
Vd08G0663	2198356	2200989	+	fibronectin [Verticillium dahliae VdLs.17]
Vd08G0679	2253381	2255397	+	pectinesterase family protein [Verticillium dahliae VdLs.17]
Vd08G0681	2259661	2261354	+	hypothetical protein VDAG_02129 [Verticillium dahliae VdLs.17]
Vd08G0685	2269028	2275372	+	tyrosinase [Verticillium alfalfae VaMs.102]
Vd08G0686	2275361	2292777	-	conserved hypothetical protein [Verticillium alfalfae VaMs.102]
Vd08G0697	2318613	2319203	-	hypothetical protein VDAG_02824, partial [Verticillium dahliae VdLs.17]
Vd08G0698	2322903	2324014	+	hypothetical protein VDAG_04306 [Verticillium dahliae VdLs.17]
Vd08G0710	2360005	2361781	-	carboxypeptidase [Verticillium dahliae VdLs.17]
Vd08G0717	2385189	2387515	-	conserved hypothetical protein [Verticillium alfalfae VaMs.102]
Vd08G0732	2440422	2441374	-	hypothetical protein VDAG_05017 [Verticillium dahliae VdLs.17]
Vd08G0747	2481674	2483474	-	beta-xylosidase [Verticillium dahliae VdLs.17]
Vd08G0778	2592441	2593726	+	hypothetical protein VDAG_03096 [Verticillium dahliae VdLs.17]
Vd08G0821	2731792	2734425	-	predicted protein [Verticillium alfalfae VaMs.102]
Vd08G0823	2736439	2737937	-	exoglucanase-6A [Verticillium dahliae VdLs.17]
Vd08G0842	2799102	2800016	-	pectinesterase [Verticillium dahliae VdLs.17]
Vd08G0875	2908939	2909442	-	hypothetical protein VDAG_06933 [Verticillium dahliae VdLs.17]
Vd08G0886	2949722	2950841	-	hypothetical protein VDAG_01714 [Verticillium dahliae VdLs.17]
Vd08G0900	2999332	3001360	+	hypothetical protein VDAG_02067 [Verticillium dahliae VdLs.17]
Vd08G0903	3015363	3016963	+	hypothetical protein VDAG_04032 [Verticillium dahliae VdLs.17]
Vd08G0921	3063574	3064905	-	endo-1,4-beta-xylanase I [Verticillium dahliae VdLs.17]
Vd08G0922	3067535	3070805	+	predicted protein [Verticillium alfalfae VaMs.102]
Vd08G0953	3153900	3155428	-	hypothetical protein VDAG_02982 [Verticillium dahliae VdLs.17]
Vd08G0954	3156620	3157655	-	hypothetical protein VDAG_10480 [Verticillium dahliae VdLs.17]
Vd08G0968	3216956	3219125	-	acetylcholinesterase [Verticillium dahliae VdLs.17]
Vd08G0975	3237825	3238162	+	hypothetical protein VDAG_04125 [Verticillium dahliae VdLs.17]
Vd08G0981	3262355	3264156	+	hypothetical protein VDAG_02751 [Verticillium dahliae VdLs.17]
