# Supplementary material for: High-quality genome assembly of Verticillium dahliae VD991 allows for screening and validation of pathogenic genes
Source: Front Microbiol. 2023 May 31;14:1177078. doi: 10.3389/fmicb.2023.1177078 (PMC10289290; doi:10.3389/fmicb.2023.1177078)
Supplement: Supplementary file 6 [file Table_6.xlsx]

## Sheet: Sheet1
Table S6. Prediction of effector proteins.
geneID	star	end	direction	function
Vd01G0180	685718	687028	-	hypothetical protein VDAG_09774 [Verticillium dahliae VdLs.17]
Vd01G0204	755932	758438	-	hypothetical protein VDAG_08708 [Verticillium dahliae VdLs.17]
Vd01G0359	1226684	1231843	-	hypothetical protein VDAG_07157 [Verticillium dahliae VdLs.17]
Vd01G0373	1274730	1279461	-	endoglucanase-4 [Verticillium alfalfae VaMs.102]
Vd01G0415	1403491	1405226	+	hypothetical protein VDAG_04705 [Verticillium dahliae VdLs.17]
Vd01G0469	1555162	1556061	-	hypothetical protein VDAG_08138 [Verticillium dahliae VdLs.17]
Vd01G0478	1577294	1579067	-	hypothetical protein VDAG_01605 [Verticillium dahliae VdLs.17]
Vd01G0537	1750369	1754383	+	hypothetical protein FPSE_04937 [Fusarium pseudograminearum CS3096]
Vd01G0592	1903037	1905020	-	pectate lyase D [Verticillium dahliae VdLs.17]
Vd01G0630	2032735	2033937	-	hypothetical protein VDAG_00429 [Verticillium dahliae VdLs.17]
Vd01G0755	2417188	2419432	+	hypothetical protein VDAG_07241 [Verticillium dahliae VdLs.17]
Vd01G0781	2491853	2492837	-	pectate lyase D [Verticillium alfalfae VaMs.102]
Vd01G0799	2542863	2543257	+	hypothetical protein VDAG_01296 [Verticillium dahliae VdLs.17]
Vd01G0820	2613359	2615386	+	acetylesterase [Verticillium dahliae VdLs.17]
Vd01G0986	3323460	3324790	+	fungal cellulose binding domain-containing protein [Verticillium dahliae VdLs.17]
Vd01G1061	3579784	3582766	-	hypothetical protein VDAG_07972 [Verticillium dahliae VdLs.17]
Vd01G1189	4005722	4007366	-	hypothetical protein VDAG_04830 [Verticillium dahliae VdLs.17]
Vd01G1251	4197791	4199548	+	hypothetical protein VDAG_07379 [Verticillium dahliae VdLs.17]
Vd01G1297	4348690	4356896	-	hypothetical protein VDAG_07958 [Verticillium dahliae VdLs.17]
Vd01G1337	4463207	4463548	+	hypothetical protein VDAG_03499 [Verticillium dahliae VdLs.17]
Vd01G1458	4877978	4878460	+	hypothetical protein VDAG_02230 [Verticillium dahliae VdLs.17]
Vd01G1472	4927898	4931328	+	hypothetical protein VDAG_00900 [Verticillium dahliae VdLs.17]
Vd01G1670	5518217	5519184	+	hypothetical protein VDAG_03287 [Verticillium dahliae VdLs.17]
Vd01G1769	5855963	5859649	-	hypothetical protein VDAG_00206 [Verticillium dahliae VdLs.17]
Vd01G1935	6391605	6399413	-	none
Vd01G1966	6495031	6496429	+	hypothetical protein VDAG_02735 [Verticillium dahliae VdLs.17]
Vd01G2062	6787002	6791127	+	lectin [Verticillium alfalfae VaMs.102]
Vd01G2233	7359940	7361812	+	cutinase-2 [Verticillium alfalfae VaMs.102]
Vd01G2249	7398180	7411094	-	hypothetical protein VDAG_10515 [Verticillium dahliae VdLs.17]
Vd01G2321	7582893	7584878	+	FCY1p [Verticillium dahliae VdLs.17]
Vd01G2375	7725377	7727548	-	hypothetical protein VDAG_03704 [Verticillium dahliae VdLs.17]
Vd02G0065	379948	381714	-	hypothetical protein VDAG_09555 [Verticillium dahliae VdLs.17]
Vd02G0296	1107477	1108772	-	lysozyme [Verticillium dahliae VdLs.17]
Vd02G0511	1917023	1918950	-	predicted protein [Verticillium alfalfae VaMs.102]
Vd02G0588	2242733	2244024	+	alpha-N-arabinofuranosidase [Verticillium dahliae VdLs.17]
Vd02G0718	2722012	2723556	-	hypothetical protein CGLO_08867 [Colletotrichum gloeosporioides Cg-14]
Vd02G0722	2733990	2736813	+	necrosis- and ethylene-inducing protein [Verticillium dahliae VdLs.17]
Vd02G0930	3624567	3629181	-	FAS1 domain-containing protein [Verticillium dahliae VdLs.17]
Vd02G0964	3729560	3732524	+	hypothetical protein VDAG_06516 [Verticillium dahliae VdLs.17]
Vd02G1045	3976418	3978446	+	cation-transporting ATPase pacS [Verticillium alfalfae VaMs.102]
Vd02G1304	4858575	4861369	-	hypothetical protein VDAG_02640 [Verticillium dahliae VdLs.17]
Vd02G1366	5065686	5068639	+	none
Vd02G1378	5096619	5099981	+	YesU [Verticillium dahliae VdLs.17]
Vd02G1396	5149629	5150265	+	predicted protein [Verticillium alfalfae VaMs.102]
Vd03G0036	238801	239331	+	carbonic anhydrase [Verticillium dahliae VdLs.17]
Vd03G0052	287220	288443	-	hypothetical protein VDAG_01298 [Verticillium dahliae VdLs.17]
Vd03G0084	401453	401909	+	transmembrane emp24 domain-containing protein [Verticillium dahliae VdLs.17]
Vd03G0286	981368	981700	+	hypothetical protein VDAG_09319 [Verticillium dahliae VdLs.17]
Vd03G0333	1108710	1111066	+	hypothetical protein VDAG_07682 [Verticillium dahliae VdLs.17]
Vd03G0376	1267874	1269060	-	pectate lyase [Verticillium dahliae VdLs.17]
Vd03G0382	1284397	1285048	+	hypothetical protein VDAG_09383 [Verticillium dahliae VdLs.17]
Vd03G0398	1347532	1348195	-	hypothetical protein VDAG_03190 [Verticillium dahliae VdLs.17]
Vd03G0455	1528391	1529719	+	hypothetical protein VDAG_03709 [Verticillium dahliae VdLs.17]
Vd03G0499	1663027	1666763	+	hypothetical protein VDAG_04228 [Verticillium dahliae VdLs.17]
Vd03G0566	1880497	1883158	-	hypothetical protein VDAG_01231 [Verticillium dahliae VdLs.17]
Vd03G0581	1951665	1955174	+	metalloprotease [Verticillium dahliae VdLs.17]
Vd03G0609	2039581	2050805	-	hypothetical protein VDAG_09363 [Verticillium dahliae VdLs.17]
Vd03G0610	2051719	2056568	-	methionine-r-sulfoxide reductase [Colletotrichum gloeosporioides Nara gc5]
Vd03G0726	2639704	2640858	-	SnodProt1 [Verticillium dahliae VdLs.17]
Vd03G0739	2675362	2677765	+	hypothetical protein VDAG_06088 [Verticillium dahliae VdLs.17]
Vd03G0745	2687369	2690363	+	endosomal protein P24B [Verticillium dahliae VdLs.17]
Vd03G0796	2853634	2855046	+	carbonate dehydratase [Verticillium dahliae VdLs.17]
Vd03G0819	2929283	2930999	+	endo-1,4-beta-xylanase [Verticillium dahliae VdLs.17]
Vd03G0885	3124584	3128379	+	hypothetical protein VDAG_03799 [Verticillium dahliae VdLs.17]
Vd03G1096	3967805	3968775	-	hypothetical protein VDAG_07772 [Verticillium dahliae VdLs.17]
Vd03G1160	4223664	4230842	+	none
Vd03G1201	4348921	4350510	+	pectate lyase L [Verticillium dahliae VdLs.17]
Vd04G0030	109073	110356	+	predicted protein [Verticillium alfalfae VaMs.102]
Vd04G0072	230620	231943	-	predicted protein [Verticillium alfalfae VaMs.102]
Vd04G0152	460771	461634	-	endo alpha-1,4 polygalactosaminidase precusor [Verticillium dahliae VdLs.17]
Vd04G0231	673499	673882	+	hypothetical protein VDAG_10525 [Verticillium dahliae VdLs.17]
Vd04G0272	778760	779386	+	conserved hypothetical protein [Verticillium alfalfae VaMs.102]
Vd04G0334	967554	969902	+	predicted protein [Verticillium alfalfae VaMs.102]
Vd04G0355	1030991	1032243	+	endoglucanase-5 [Verticillium dahliae VdLs.17]
Vd04G0400	1148330	1150486	+	hypothetical protein V502_07073 [Pseudogymnoascus pannorum VKM F-4520 (FW-2644)]
Vd04G0527	1479414	1482443	+	fungal cellulose binding domain-containing protein [Verticillium dahliae VdLs.17]
Vd04G0536	1503095	1507007	-	hypothetical protein VDBG_10128 [Verticillium alfalfae VaMs.102]
Vd04G0641	2012821	2014509	-	secreted protein [Verticillium dahliae VdLs.17]
Vd04G0687	2148395	2154858	+	pectate lyase C [Verticillium dahliae VdLs.17]
Vd04G0696	2178706	2186108	-	pectate lyase [Verticillium dahliae VdLs.17]
Vd04G0699	2198209	2201487	+	hypothetical protein VDAG_07384 [Verticillium dahliae VdLs.17]
Vd04G0943	3038973	3044639	+	predicted protein [Verticillium alfalfae VaMs.102]
Vd04G1126	3689449	3690814	+	predicted protein [Verticillium alfalfae VaMs.102]
Vd05G0102	371073	373726	+	hypothetical protein VDAG_04755 [Verticillium dahliae VdLs.17]
Vd05G0122	437165	441955	+	wsc domain-containing protein [Colletotrichum orbiculare MAFF 240422]
Vd05G0268	1026855	1027686	+	hypothetical protein VDAG_05640 [Verticillium dahliae VdLs.17]
Vd05G0281	1055933	1057907	-	pectate lyase B [Verticillium dahliae VdLs.17]
Vd05G0397	1439175	1439447	-	hypothetical protein VDAG_03488 [Verticillium dahliae VdLs.17]
Vd05G0425	1521399	1528884	+	hypothetical protein VDAG_04083 [Verticillium dahliae VdLs.17]
Vd05G0500	1744220	1746536	+	hypothetical protein VDAG_02273 [Verticillium dahliae VdLs.17]
Vd05G0569	1979319	1981679	-	hypothetical protein VDAG_06144 [Verticillium dahliae VdLs.17]
Vd05G0675	2339413	2346246	-	hypothetical protein VDAG_06554 [Verticillium dahliae VdLs.17]
Vd05G0839	2997269	2998168	+	hypothetical protein S40285_03305 [Stachybotrys chlorohalonata IBT 40285]
Vd05G0991	3458658	3460339	+	hypothetical protein VDAG_00817 [Verticillium dahliae VdLs.17]
Vd05G1072	3723328	3724470	-	endopolygalacturonase [Verticillium dahliae VdLs.17]
Vd06G0176	579902	581875	+	necrosis and ethylene inducing peptide [Verticillium dahliae]
Vd06G0346	1104655	1106746	+	PRY1 protein [Verticillium dahliae VdLs.17]
Vd06G0371	1179296	1180714	-	pectate lyase [Verticillium dahliae VdLs.17]
Vd06G0377	1192816	1198427	-	bacilysin biosynthesis oxidoreductase bacC [Verticillium dahliae VdLs.17]
Vd06G0416	1320953	1321811	-	predicted protein [Verticillium alfalfae VaMs.102]
Vd06G0542	1766535	1767294	+	hypothetical protein VDAG_07604 [Verticillium dahliae VdLs.17]
Vd06G0698	2229762	2233190	+	predicted protein [Verticillium alfalfae VaMs.102]
Vd06G0718	2328568	2331112	+	hypothetical protein VDAG_04030 [Verticillium dahliae VdLs.17]
Vd06G0753	2435329	2438388	+	hypothetical protein VDAG_07851 [Verticillium dahliae VdLs.17]
Vd06G0867	2951728	2952135	+	pectate lyase [Verticillium dahliae VdLs.17]
Vd06G0971	3287732	3288020	+	chitinase [Verticillium dahliae VdLs.17]
Vd06G1079	3649145	3650401	+	hypothetical protein VDAG_03221 [Verticillium dahliae VdLs.17]
Vd06G1081	3652338	3653663	+	hypothetical protein VDAG_04434 [Verticillium dahliae VdLs.17]
Vd07G0040	116126	116416	+	hypothetical protein VDAG_05096 [Verticillium dahliae VdLs.17]
Vd07G0068	205540	207033	-	cerato-ulmin [Verticillium dahliae VdLs.17]
Vd07G0092	276938	278567	+	dienelactone hydrolase family protein [Verticillium dahliae VdLs.17]
Vd07G0120	360883	365817	+	hypothetical protein VDAG_05682 [Verticillium dahliae VdLs.17]
Vd07G0324	1018890	1019831	-	hypothetical protein VDAG_06954 [Verticillium dahliae VdLs.17]
Vd07G0410	1369680	1373518	+	hypothetical protein VDAG_09799 [Verticillium dahliae VdLs.17]
Vd07G0731	2549880	2550222	+	endoglucanase-4 [Verticillium dahliae VdLs.17]
Vd07G0759	2613498	2615414	+	DNL zinc finger domain-containing protein [Verticillium dahliae VdLs.17]
Vd07G0815	2808232	2809730	+	hypothetical protein VDAG_08639 [Verticillium dahliae VdLs.17]
Vd07G0828	2841809	2842465	-	hypothetical protein VDAG_07115 [Verticillium dahliae VdLs.17]
Vd07G0869	2984290	2985048	+	hypothetical protein VDAG_06236 [Verticillium dahliae VdLs.17]
Vd07G0905	3081116	3084696	+	hypothetical protein VDAG_05121 [Verticillium dahliae VdLs.17]
Vd07G0967	3263341	3263907	+	hypothetical protein VDAG_01048 [Verticillium dahliae VdLs.17]
Vd07G0985	3311753	3316550	-	hypothetical protein VDAG_02705 [Verticillium dahliae VdLs.17]
Vd08G0030	84980	85719	+	secretory phospholipase A2 [Verticillium dahliae VdLs.17]
Vd08G0319	972393	974319	+	none
Vd08G0587	1851419	1854950	+	IDI-3 protein [Verticillium dahliae VdLs.17]
Vd08G0747	2481674	2483474	-	beta-xylosidase [Verticillium dahliae VdLs.17]
Vd08G0875	2908939	2909442	-	hypothetical protein VDAG_06933 [Verticillium dahliae VdLs.17]
Vd08G0981	3262355	3264156	+	hypothetical protein VDAG_02751 [Verticillium dahliae VdLs.17]
